# Supplementary material for: Association of Dance-Based Mind-Motor Activities With Falls and Physical Function Among Healthy Older Adults: A Systematic Review and Meta-analysis
Source: PubMed Central journal article supplement (PMC7519422; doi:10.1001/jamanetworkopen.2020.17688), 2020-09-25
Supplement: jamanetwopen-e2017688-s001.pdf [file jamanetwopen-e2017688-s001.pdf]

## Supplementary Online Content

Mattle M, Chocano-Bedoya PO, Fischbacher M, et al. Association of dance-based mind-motor activities with falls and physical function among healthy older adults: a systematic review and meta-analysis. *JAMA Netw Open*. 2020;3(9):e2017688.  
doi:10.1001/jamanetworkopen.2020.17688

**eAppendix.** Supplementary Material

**This supplementary material has been provided by the authors to give readers additional information about their work.**

## Search Syntax in PubMed

```
("Aged"[MeSH] OR older[Title/Abstract] OR
elderly[Title/Abstract] OR senior*[Title/Abstract] OR old-age*[Title/Abstract] OR aged[Title/Abstract])
AND
("Dance Therapy"[MeSH] OR "Dancing"[MeSH] OR "Exercise Movement Techniques"[MeSH] OR
dance* [Title/Abstract] OR dancing[Title/Abstract] OR ballet*[Title/Abstract] OR jazz*[Title/Abstract]
OR hip-hop[Title/Abstract] OR salsa*[Title/Abstract] OR zumba*[Title/Abstract] OR
aerobic*[Title/Abstract] OR taiji[Title/Abstract] OR taijiquan[Title/Abstract] OR
"tai chi"[Title/Abstract] OR eurythm*[Title/Abstract])
AND
("Accidental Falls"[MeSH] OR
Falls[Title/Abstract] OR faller* [Title/Abstract] OR falling[Title/Abstract] OR slip*[Title/Abstract] OR
stumble*[Title/Abstract] OR tumble* [Title/Abstract] OR fell[Title/Abstract] OR
balance[Title/Abstract] OR strength[Title/Abstract] OR mobility[Title/Abstract] OR
flexibility[Title/Abstract])
```

## Inclusion flow

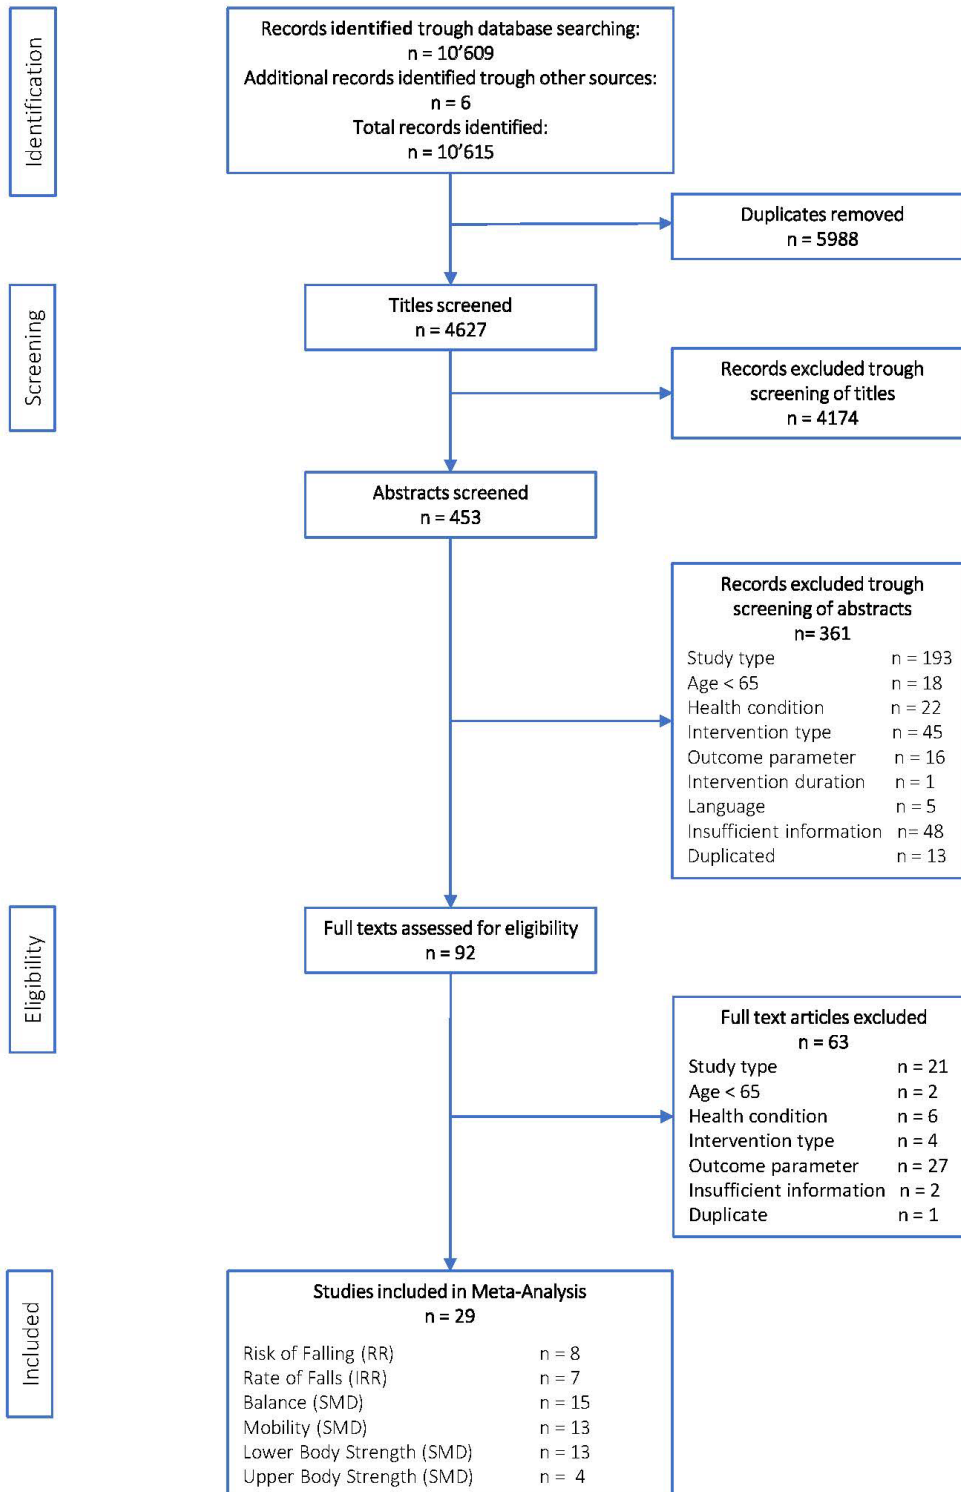

## Subgroup Analyses Risk of Falling

| <b>Risk of Falling, total N=8 trials</b>     | <b>Risk Ratio (95%CI)</b> | <b>I<sup>2</sup></b> |
|----------------------------------------------|---------------------------|----------------------|
| <b>Full</b>                                  | <b>0.63 (0.49, 0.80)</b>  | <b>54.8 %</b>        |
| <b>by intervention type</b>                  |                           |                      |
| Tai Chi                                      | 0.64 (0.48, 0.85)         | 63.5 %               |
| Non-Tai Chi                                  | 0.53 (0.26, 1.12)         | 15.5 %               |
| <b>by intervention frequency</b>             |                           |                      |
| < 3 times / week                             | 0.78 (0.66, 0.92)         | 0.0%                 |
| ≥ 3 times / week                             | 0.48 (0.31, 0.72)         | 47.1 %               |
| <b>by intervention duration</b>              |                           |                      |
| > 24 weeks                                   | 0.52 (0.21, 1.25)         | 91.4 %               |
| 12 - 24 weeks                                | 0.71 (0.58, 0.86)         | 0.0%                 |
| < 12 weeks                                   | 0.19 (0.02, 1.51)         | --                   |
| <b>by type of dwelling</b>                   |                           |                      |
| community dwelling                           | 0.58 (0.41, 0.82)         | 60.9 %               |
| living facilities                            | 0.77 (0.63, 0.95)         | 0.0%                 |
| <b>by type of randomization</b>              |                           |                      |
| participants randomized                      | 0.56 (0.38, 0.82)         | 68.4 %               |
| cluster randomized                           | 0.77 (0.63, 0.94)         | 0.0%                 |
| <b>by duration of one class</b>              |                           |                      |
| < 60 min                                     | 0.77 (0.63, 0.94)         | 0.0%                 |
| ≥ 60 min                                     | 0.69 (0.54, 0.89)         | 19.6 %               |
| Woo et al. do not report time                |                           |                      |
| <b>by total contact time</b>                 |                           |                      |
| < 90 min                                     | 0.73 (0.61, 0.87)         | 0.0%                 |
| ≥ 90 min                                     | 0.75 (0.55, 1.02)         | - 25.7 %             |
| Woo et al. do not report duration of classes |                           |                      |

## Association of dance-based mind-motor activities with risk of falling by intervention type

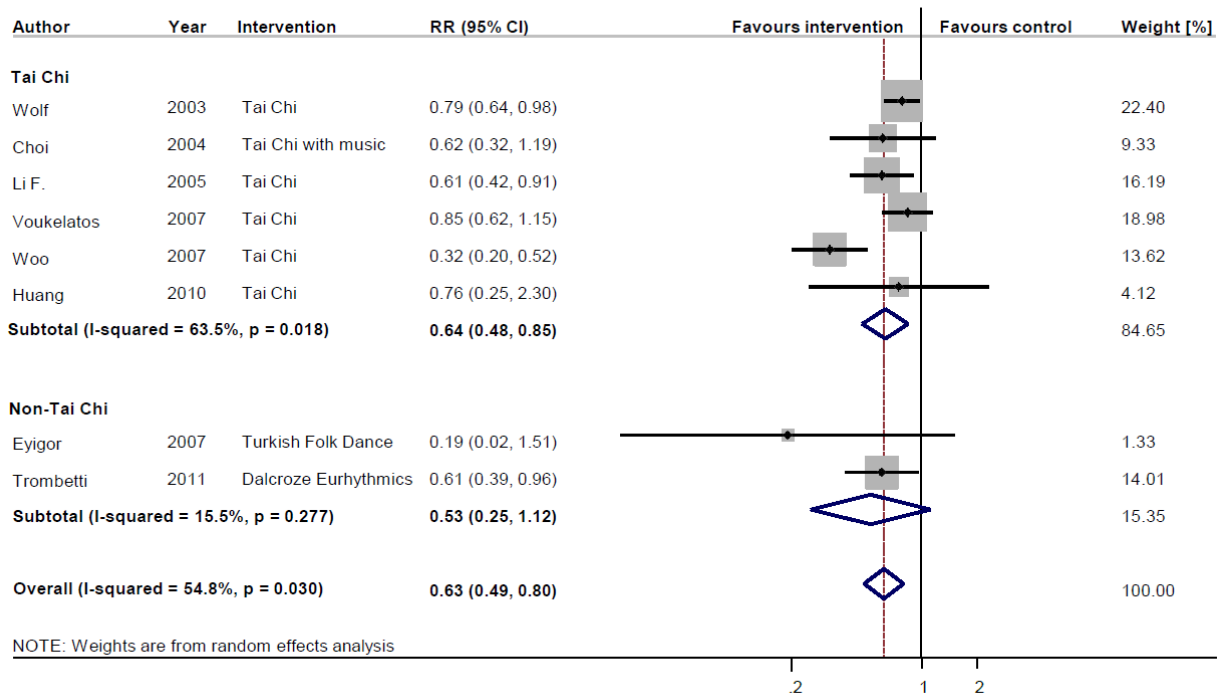

## Association of dance-based mind-motor activities with risk of falling by intervention frequency

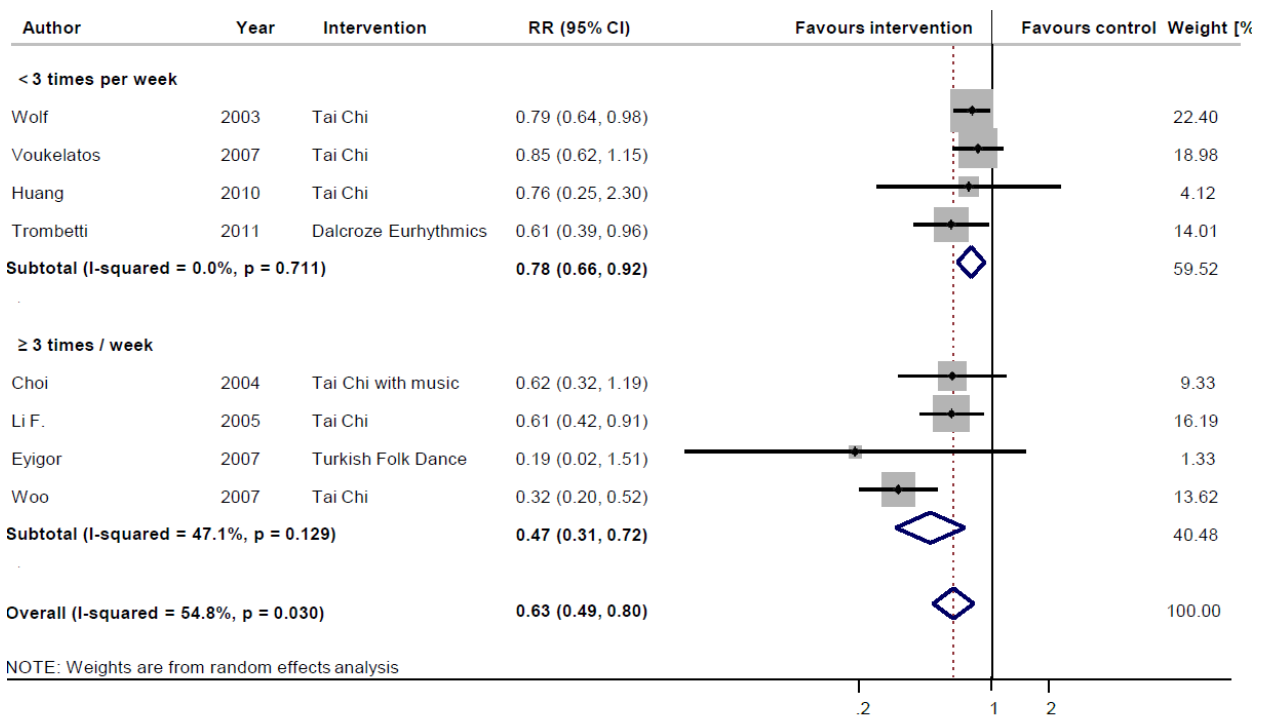

## Association of dance-based mind-motor activities with risk of falling by intervention duration

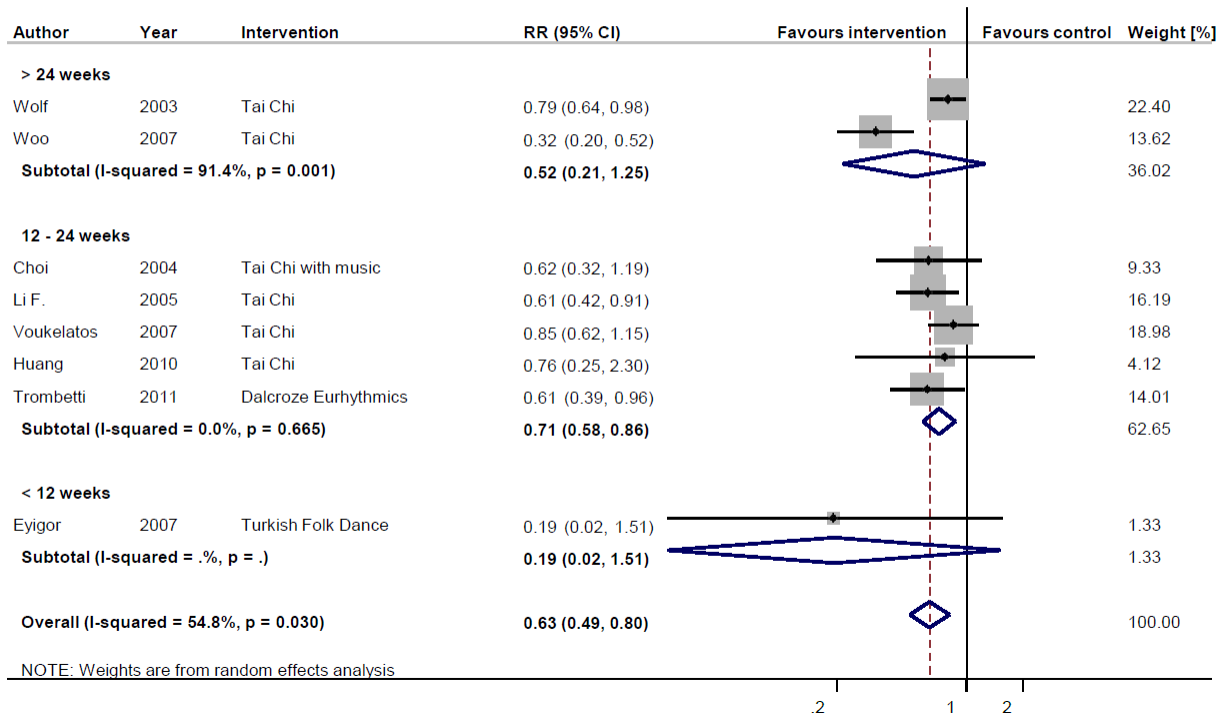

## Association of dance-based mind-motor activities with risk of falling by type of dwelling

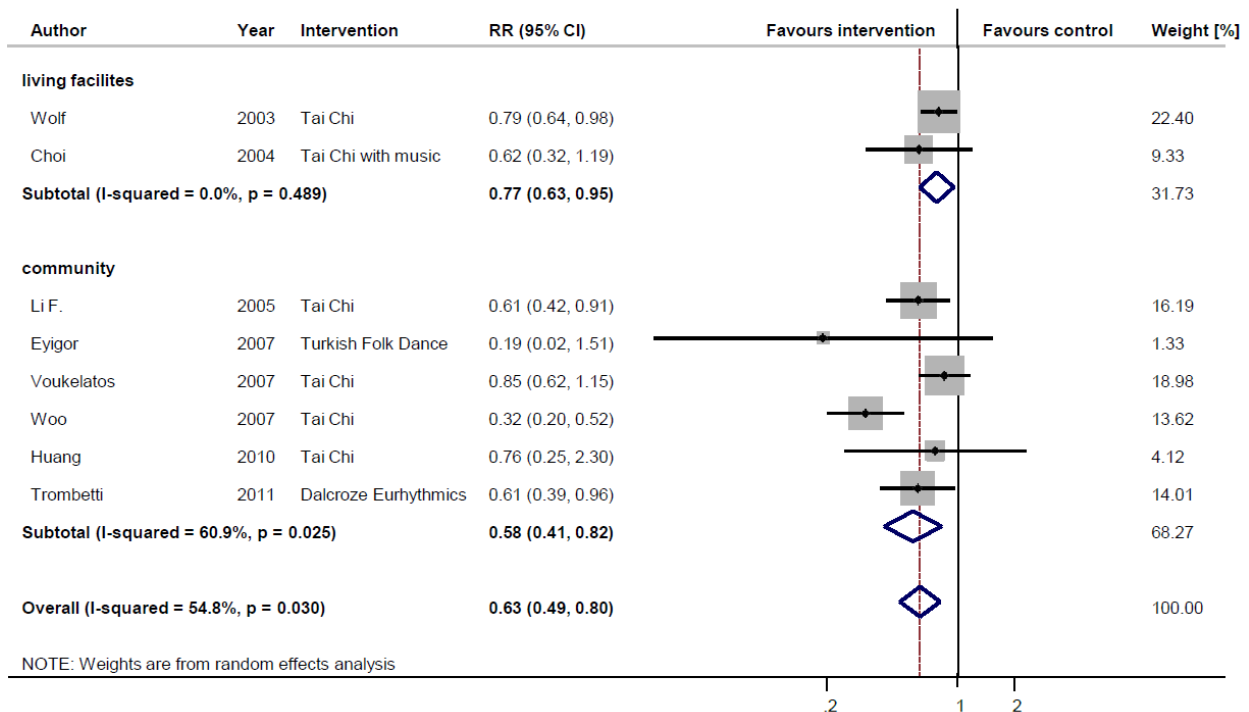

## Association of dance-based mind-motor activities with risk of falling by type of randomization

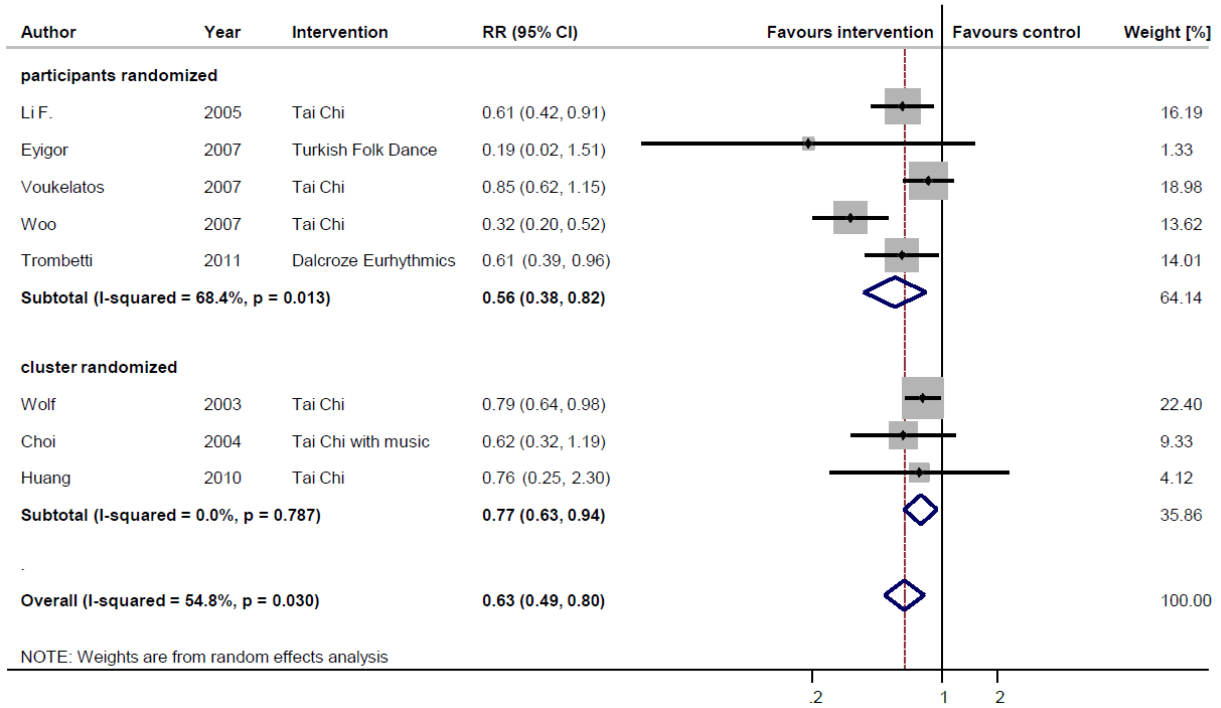

## Association of dance-based mind-motor activities with risk of falling by duration of one session

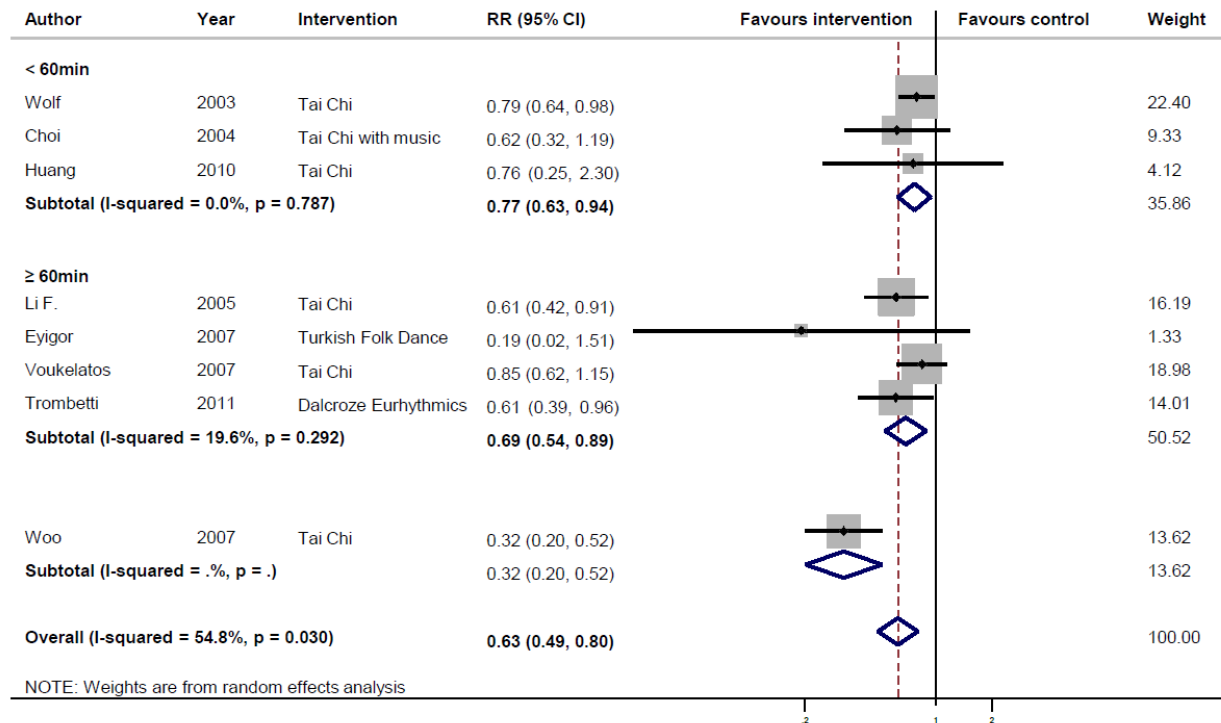

# Association of dance-based mind-motor activities with risk of falling by total contact time

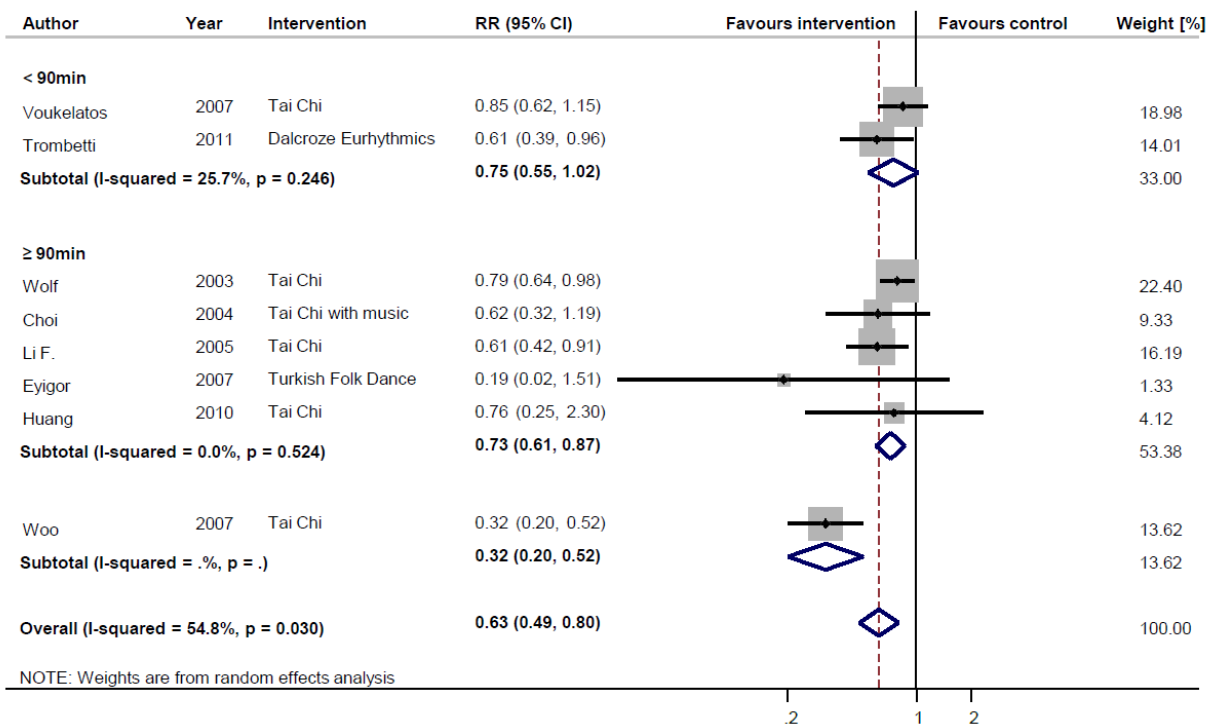



## Sensitivity Analyses Risk of Falling

### Association of dance-based mind-motor activities with risk of falling Sensitivity analysis 1: without Woo et al.

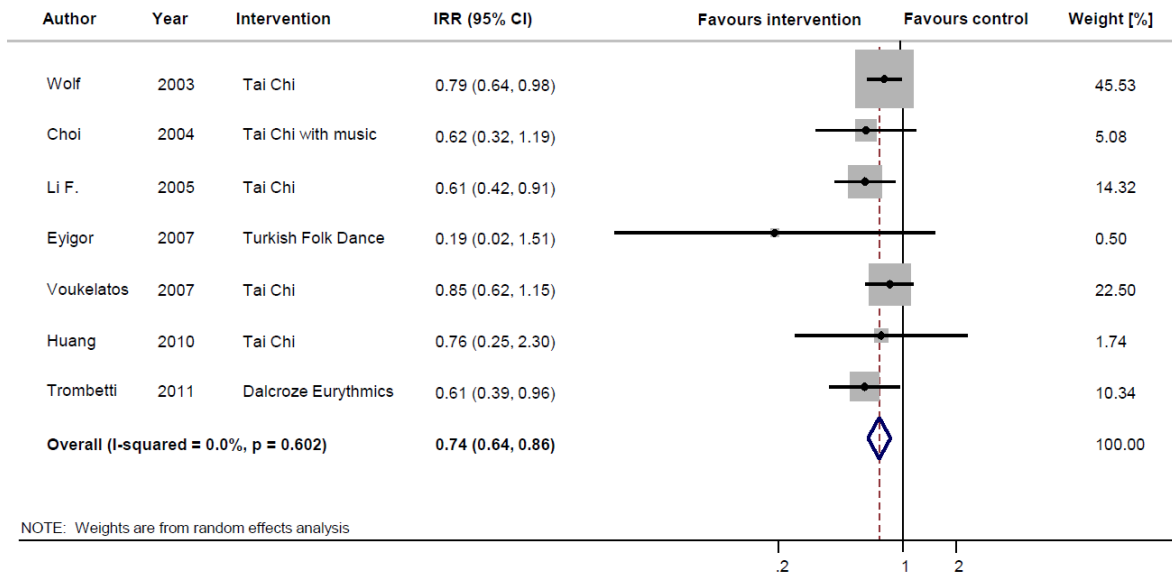

### Association of dance-based mind-motor activities with rate of falls Sensitivity analysis 2: without Eyigor et al.

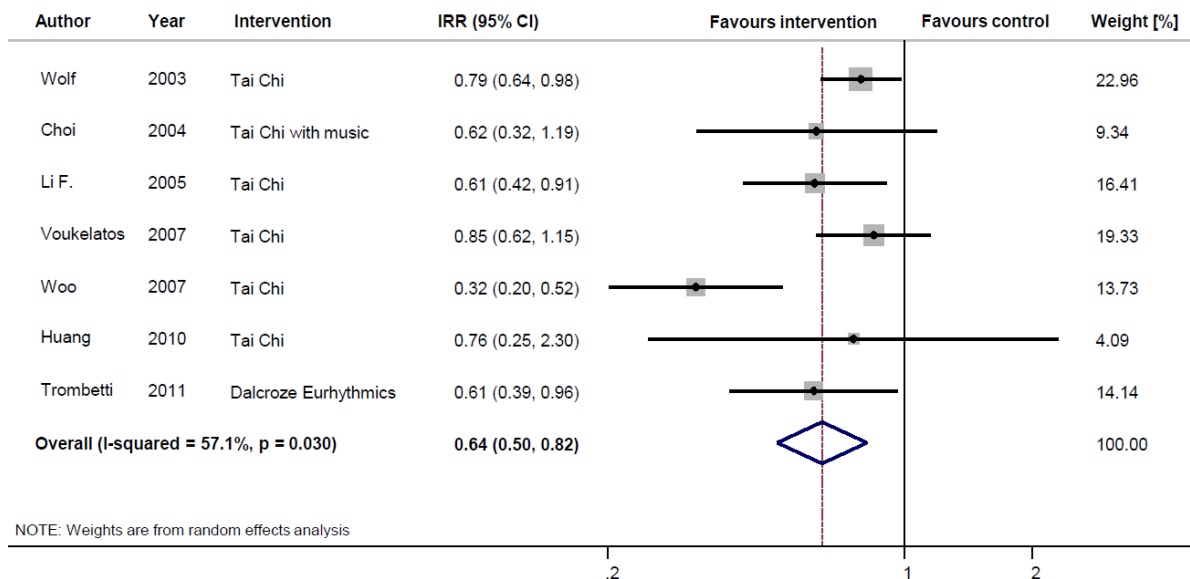

## Subgroup Analyses Rate of Falls

| Rate of Falls, total N=7 trials  | IRR (95%CI)              | I <sup>2</sup> |
|----------------------------------|--------------------------|----------------|
| <b>Full</b>                      | <b>0.69 (0.53, 0.89)</b> | <b>73.0 %</b>  |
| <b>by intervention type</b>      |                          |                |
| Tai Chi                          | 0.64 (0.54, 0.74)        | 0.0%           |
| Non-Tai Chi                      | 0.88 (0.02, 1.75)        | 91.7 %         |
| <b>by intervention frequency</b> |                          |                |
| < 3 times / week                 | 0.80 (0.59, 1.01)        | 68.0 %         |
| ≥ 3 times / week                 | 0.55 (0.39, 0.70)        | 0.0%           |
| <b>by intervention duration</b>  |                          |                |
| > 24 weeks                       | 1.00 (0.41, 1.60)        | 85.4 %         |
| 12 - 24 weeks                    | 0.57 (0.47, 0.61)        | 0.0%           |
| < 12 weeks                       | --                       | --             |
| <b>by type of dwelling</b>       |                          |                |
| community dwelling               | 0.65 (0.48, 0.82)        | 0.0%           |
| institutionalized                | 1.00 (0.41, 1.60)        | 85.4 %         |
| <b>by type of randomization</b>  |                          |                |
| participants randomized          | 0.57 (0.47, 0.68)        | 0.0%           |
| cluster randomized               | 1.00 (0.41, 1.60)        | 85.4 %         |
| <b>by duration of one class</b>  |                          |                |
| < 60 min                         | 0.63 (0.45, 0.89)        | --             |
| ≥ 60 min                         | 0.70 (0.52, 0.95)        | 76.8 %         |
| <b>by total contact time</b>     |                          |                |
| < 90 min                         | 0.69 (0.53, 0.89)        | 73.0 %         |
| ≥ 90 min                         | 0.73 (0.53, 1.00)        | 79.3 %         |

## Association of dance-based mind-motor activities with rate of falls by intervention type

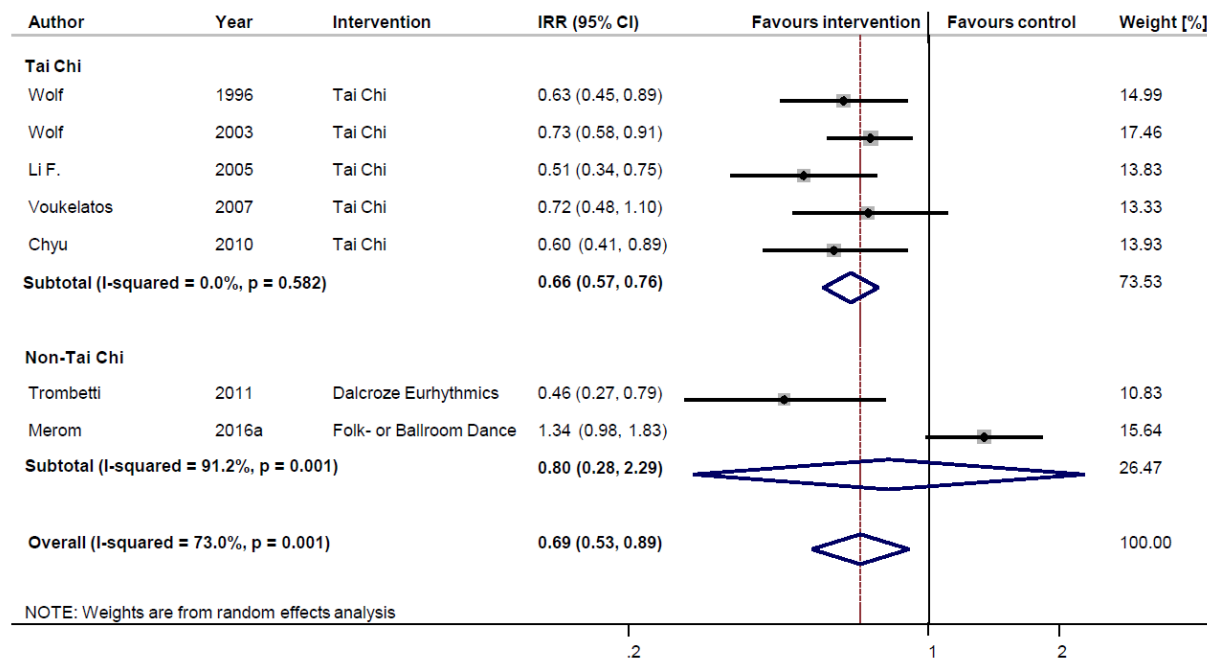

## Association of dance-based mind-motor activities with rate of falls by intervention frequency

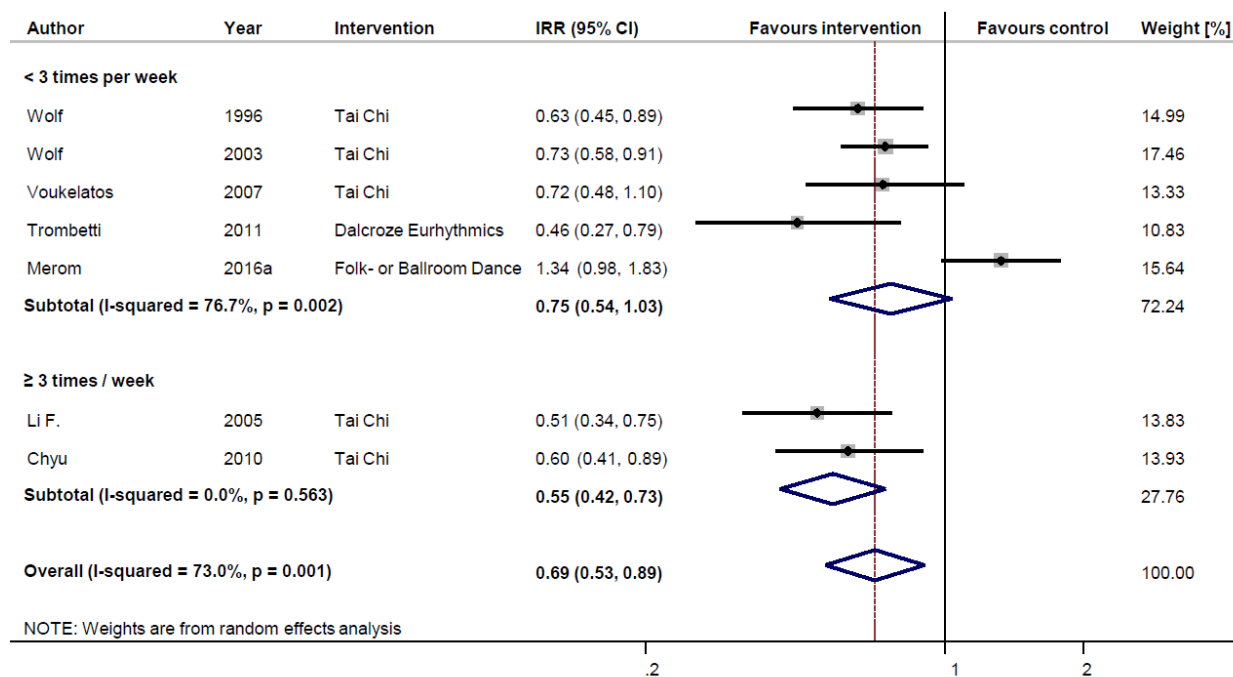

## Association of dance-based mind-motor activities with rate of falls by intervention duration

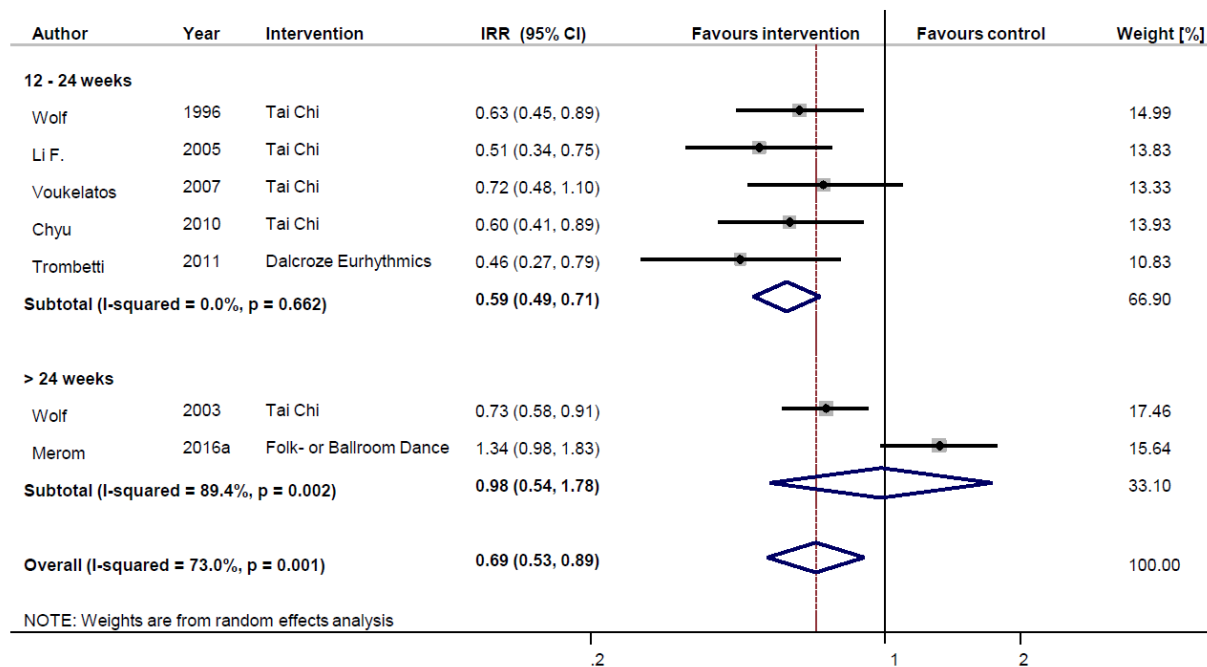

## Association of dance-based mind-motor activities with rate of falls by type of dwelling

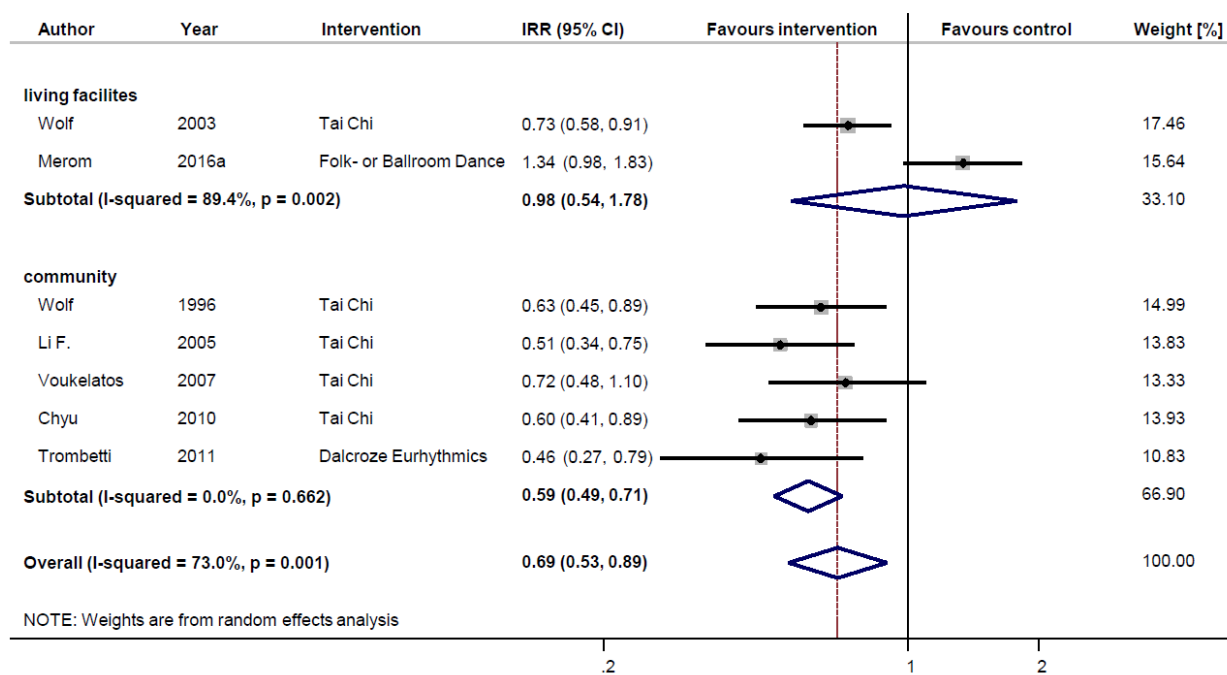

## Association of dance-based mind-motor activities with rate of falls by type of randomization

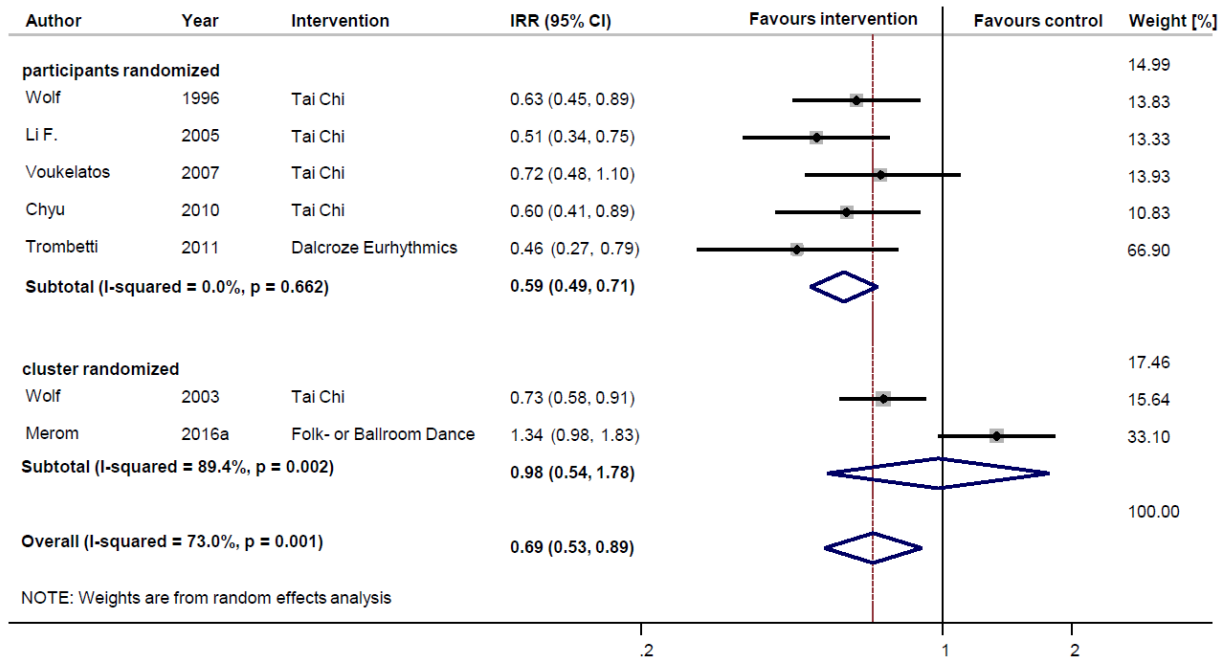

## Association of dance-based mind-motor activities with rate of falls by duration of one class

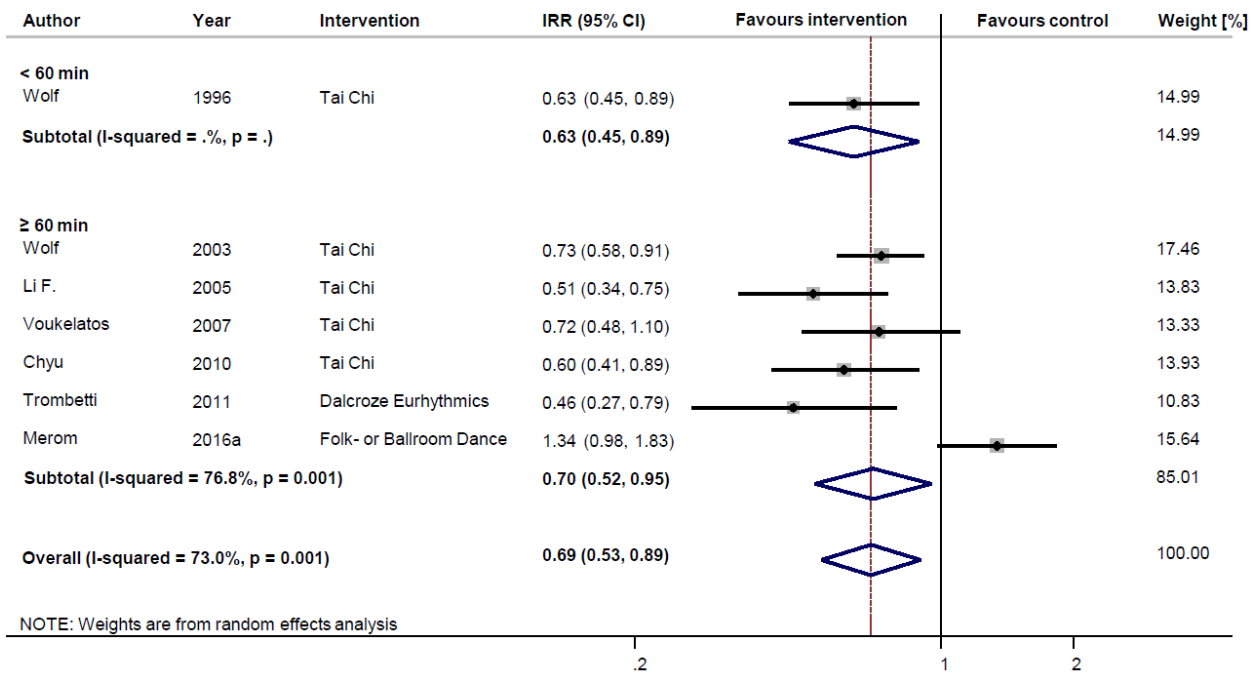

# Association of dance-based mind-motor activities with rate of falls by total contact time

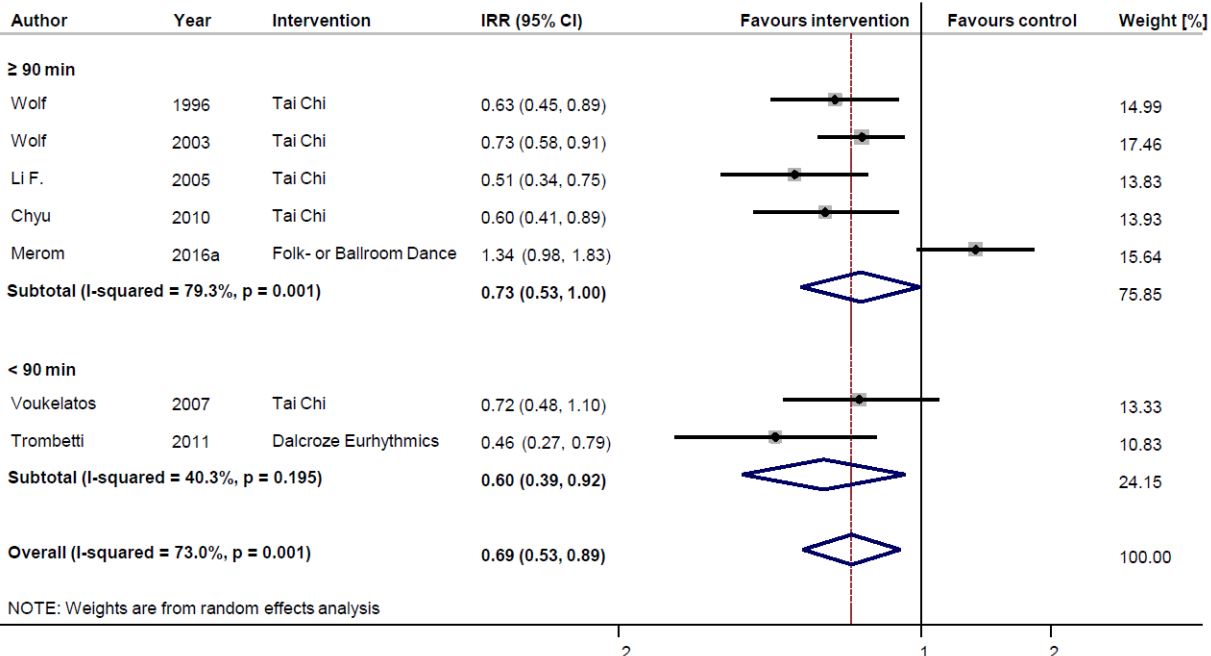

## Subgroup Analysis of Secondary Outcomes

| Balance (N=15)                               | SMD (95%CI)              | I <sup>2</sup> |
|----------------------------------------------|--------------------------|----------------|
| <b>Full</b>                                  | <b>0.62 (0.33, 0.90)</b> | <b>90.1%</b>   |
| <b>by intervention type</b>                  |                          |                |
| Tai Chi                                      | 0.62 (0.33, 0.90)        | 93.0 %         |
| Non-Tai Chi                                  | 0.86 (0.33, 1.39)        | 81.0 %         |
| <b>by intervention frequency</b>             |                          |                |
| < 3 times / week                             | 0.23 (0.02, 0.48)        | 62.3 %         |
| ≥ 3 times / week                             | 0.84 (0.54, 1.14)        | 81.4 %         |
| <b>by intervention duration</b>              |                          |                |
| > 24 weeks                                   | 0.23 (0.34, 0.80)        | 71.7 %         |
| 12 - 24 weeks                                | 0.54 (0.21, 0.87)        | 91.5 %         |
| < 12 weeks                                   | 1.31 (0.12, 2.49)        | 87.4 %         |
| <b>by type of dwelling</b>                   |                          |                |
| community dwelling                           | 0.62 (0.314, 0.93)       | 90.8 %         |
| institutionalized                            | 0.61 (0.24, 0.97)        | --             |
| <b>by type of randomization</b>              |                          |                |
| participants randomized                      | 0.61 (0.28, 0.93)        | 91.4 %         |
| cluster randomized                           | 0.69 (0.40, 0.98)        | 0.0%           |
| <b>by duration of one class</b>              |                          |                |
| < 60 min                                     | 0.89 (0.41, 1.36)        | 85.6 %         |
| ≥ 60 min                                     | 0.51 (0.10, 0.92)        | 92.7 %         |
| Woo et al. do not report time                |                          |                |
| <b>by total contact time</b>                 |                          |                |
| < 90 min                                     | 0.49 (0.15, 0.83)        | --             |
| 90 -120 min                                  | 0.33 (0.02, 0.64)        | 76.6 %         |
| ≥ 120 min                                    | 0.96 (0.64, 1.28)        | 76.7 %         |
| Woo et al. do not report duration of classes |                          |                |

## Association of dance-based mind-motor activities with balance by intervention type

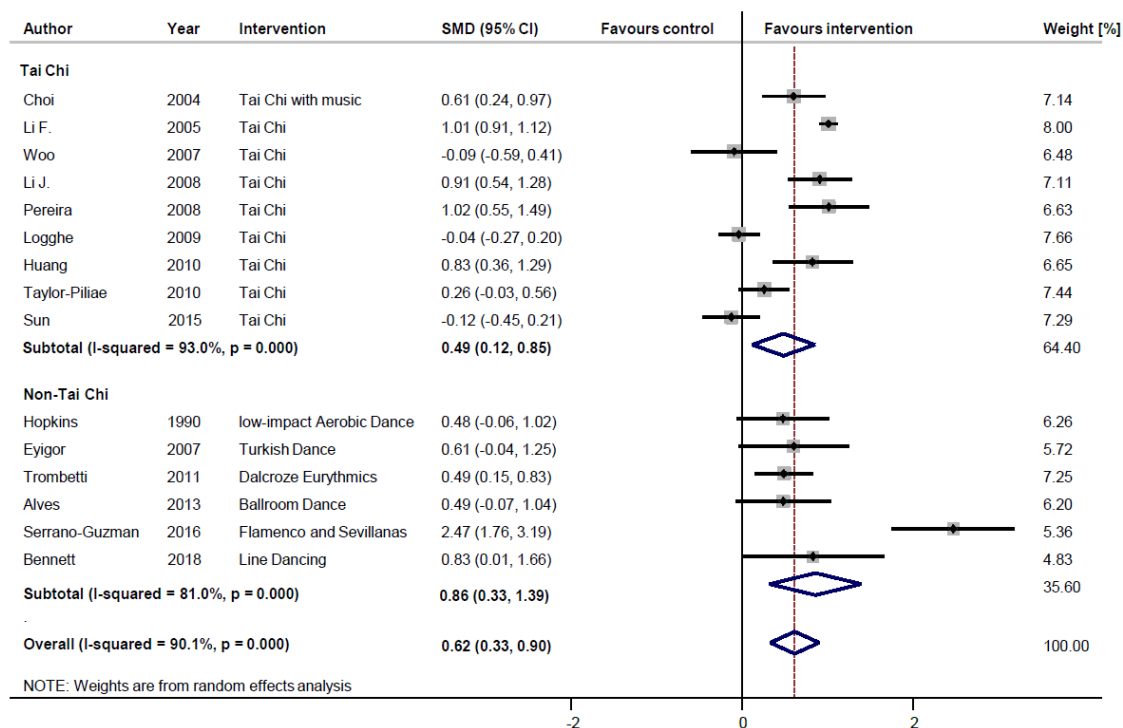

## Association of dance-based mind-motor activities with balance by intervention frequency

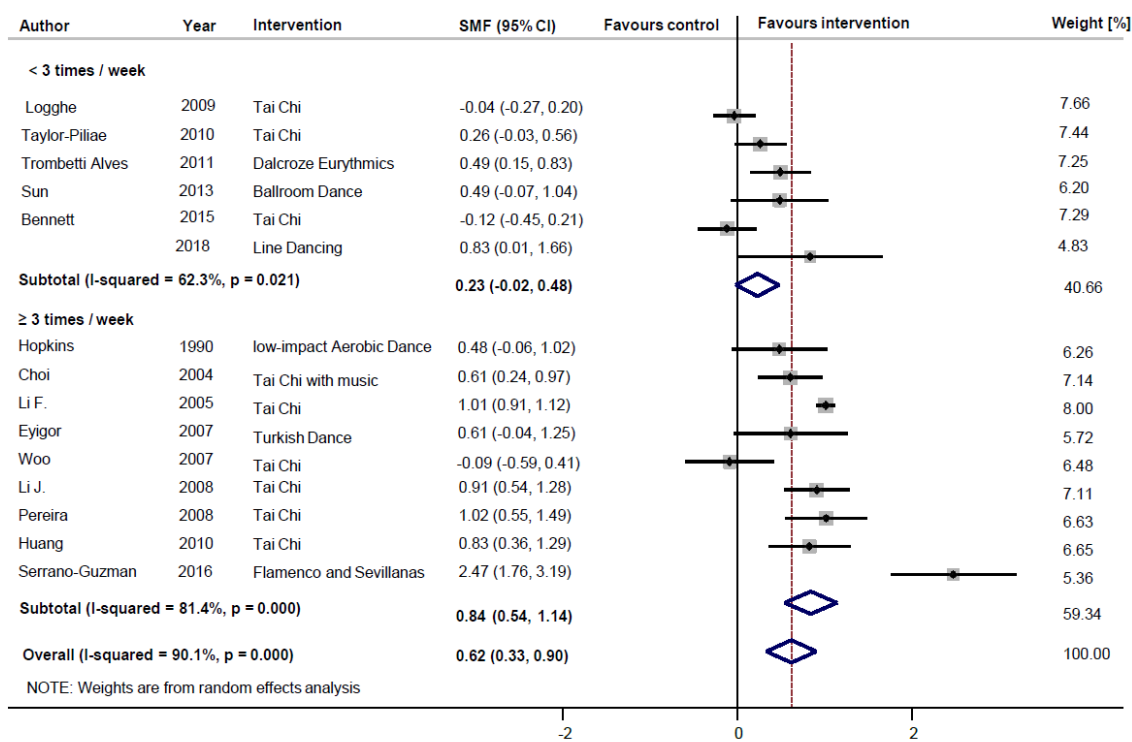



## Association of dance-based mind-motor activities with balance by intervention duration

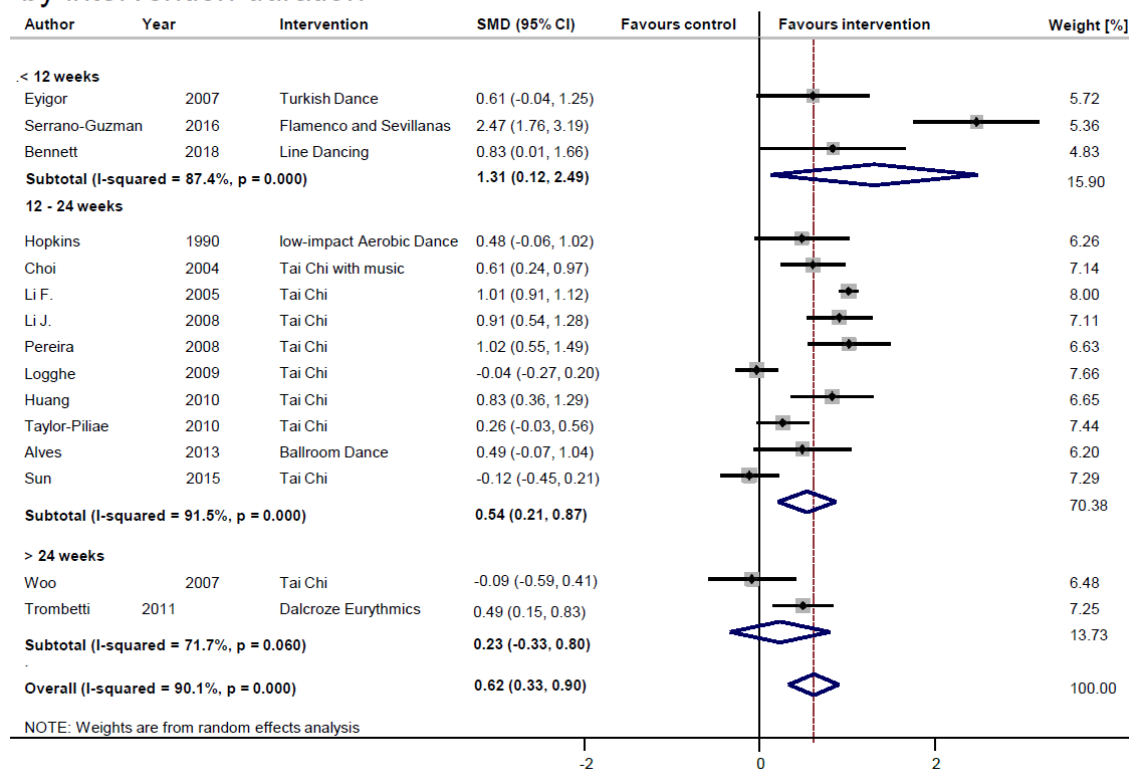

## Association of dance-based mind-motor activities with balance by type of randomization

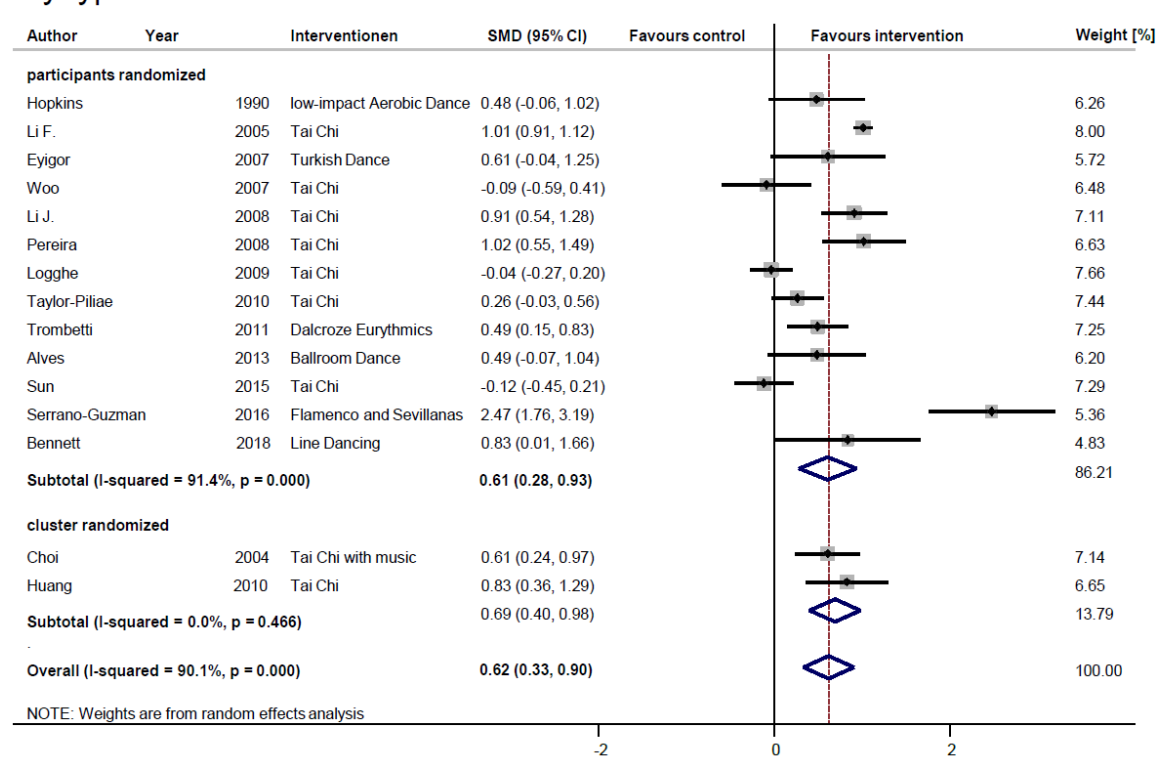

## Association of dance-based mind-motor activities with balance by duration of one class

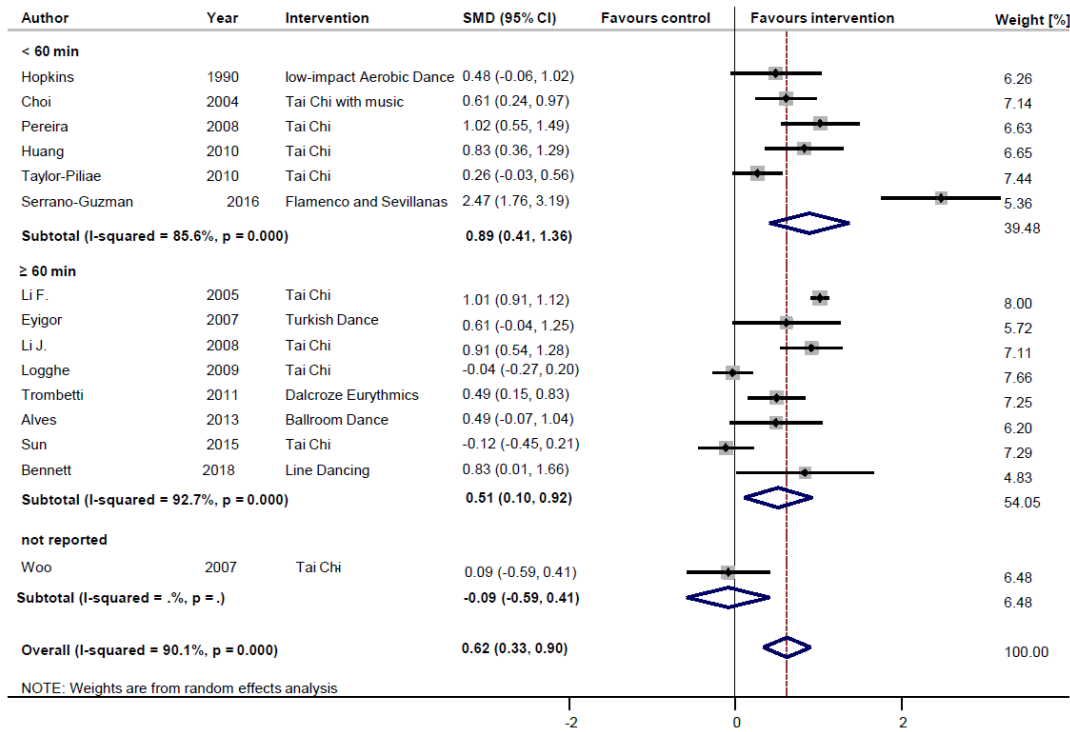

## Association of dance-based mind-motor activities with balance by total contact time

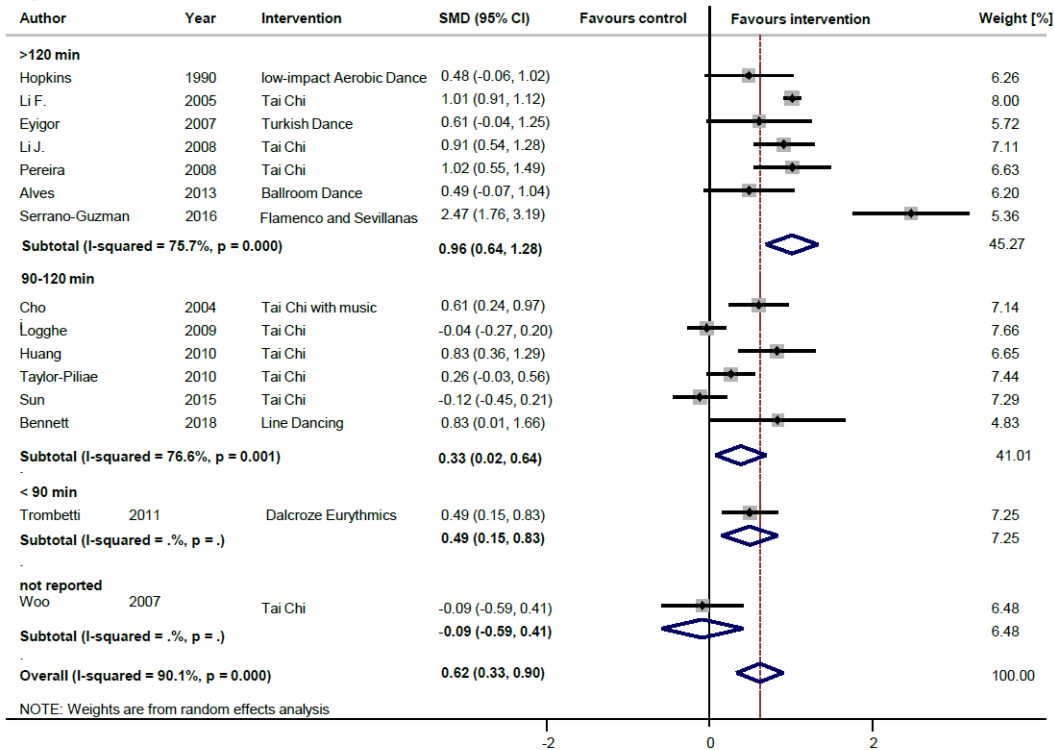

| <b>Mobility (N=13)</b>           | <b>SMD (95%CI)</b>          | <b>I<sup>2</sup></b> |
|----------------------------------|-----------------------------|----------------------|
| <b>Full</b>                      | <b>-0.56 (-0.81, -0.31)</b> | <b>77.1%</b>         |
| <b>by intervention type</b>      |                             |                      |
| Tai Chi                          | -0.31 (0.60, -0.01)         | 70.3%                |
| Non-Tai Chi                      | -0.79, (-1.16, -0.42)       | 72.5%                |
| <b>by intervention frequency</b> |                             |                      |
| < 3 times / week                 | -0.231 (-0.46, -0.01)       | 41.4%                |
| ≥ 3 times / week                 | -0.762 (-1.10, -0.42)       | 73.1%                |
| <b>by intervention duration</b>  |                             |                      |
| > 24 weeks                       | -0.26 (-0.60, 0.08)         | --                   |
| 12 - 24 weeks                    | -0.44 (-0.68, -0.20)        | 69.7%                |
| < 12 weeks                       | -1.46 (-1.96, -0.96)        | 10.4%                |
| <b>by type of dwelling</b>       |                             |                      |
| community dwelling               | -0.56 (-0.81, -0.31)        | 77.1%                |
| institutionalized                | --                          | --                   |
| <b>by type of randomization</b>  |                             |                      |
| participants randomized          | -0.59 (-0.89, -0.30)        | 80.4%                |
| cluster randomized               | -0.44 (-0.76, -0.11)        | 12.6%                |
| <b>by duration of one class</b>  |                             |                      |
| < 60 min                         | -0.75 (-1.09, -0.42)        | 55.0%                |
| ≥ 60 min                         | -0.43 (-0.73, -0.12)        | 77.9%                |
| <b>by total contact time</b>     |                             |                      |
| < 90 min                         | -0.26 (-0.60, 0.07)         | --                   |
| 90-120 min                       | -0.25 (-0.61, 0.10)         | 68.8%                |
| > 120 min                        | -0.73 (-1.05, -0.40)        | 69.3%                |

## Association of dance-based mind-motor activities with mobility by intervention type

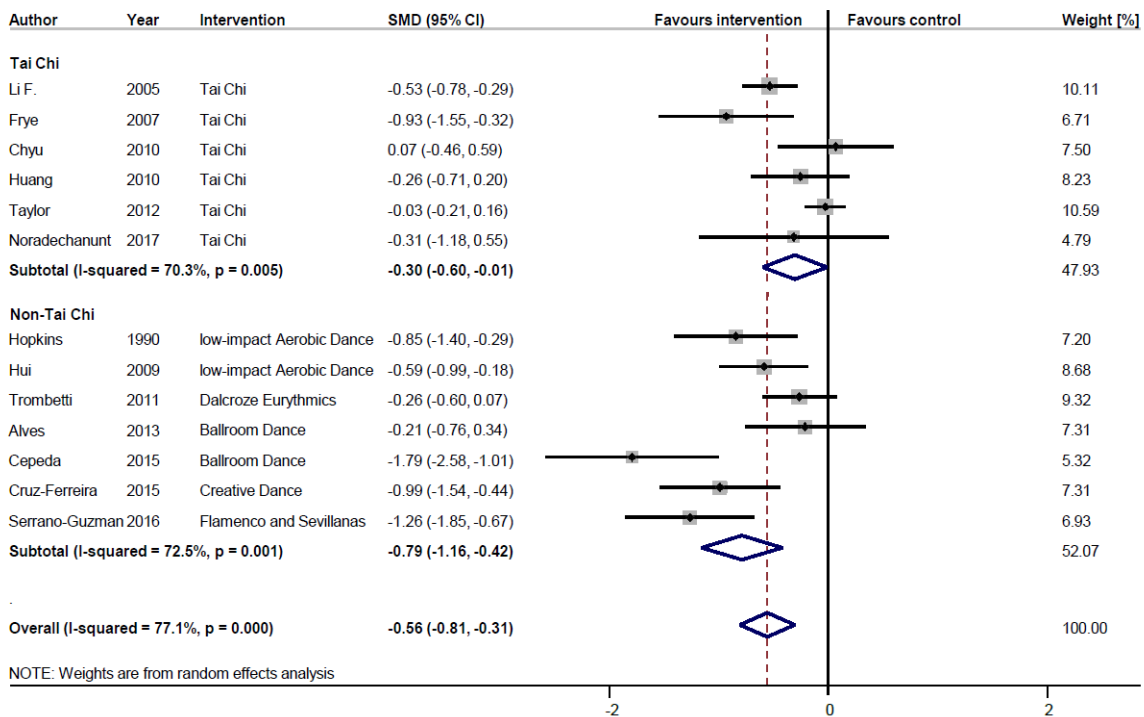

## Association of dance-based mind-motor activities with mobility by intervention frequency

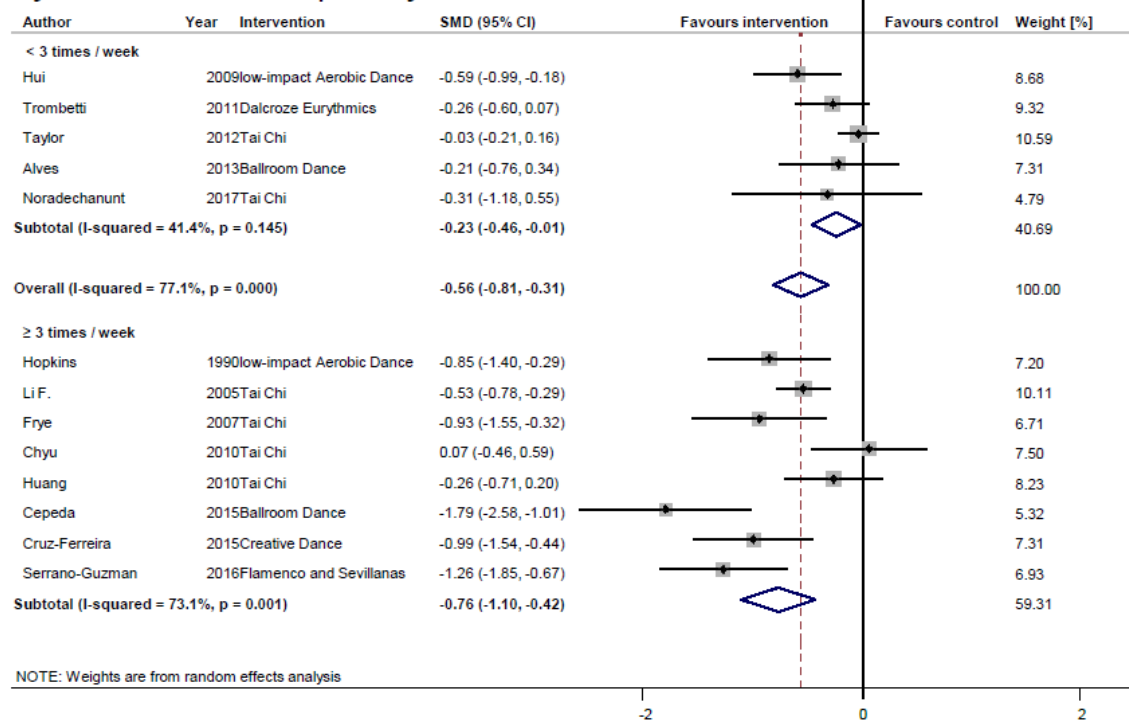

## Association of dance-based mind-motor activities with mobility by intervention duration

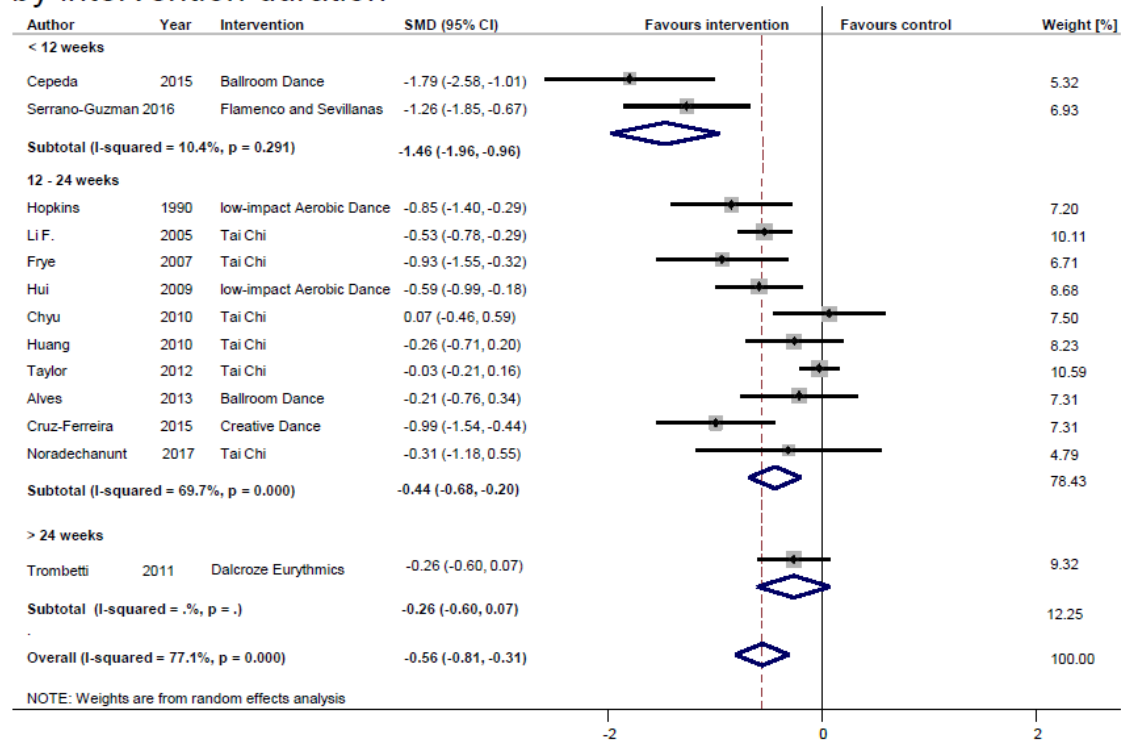

## Association of dance-based mind-motor activities with mobility by type of randomization

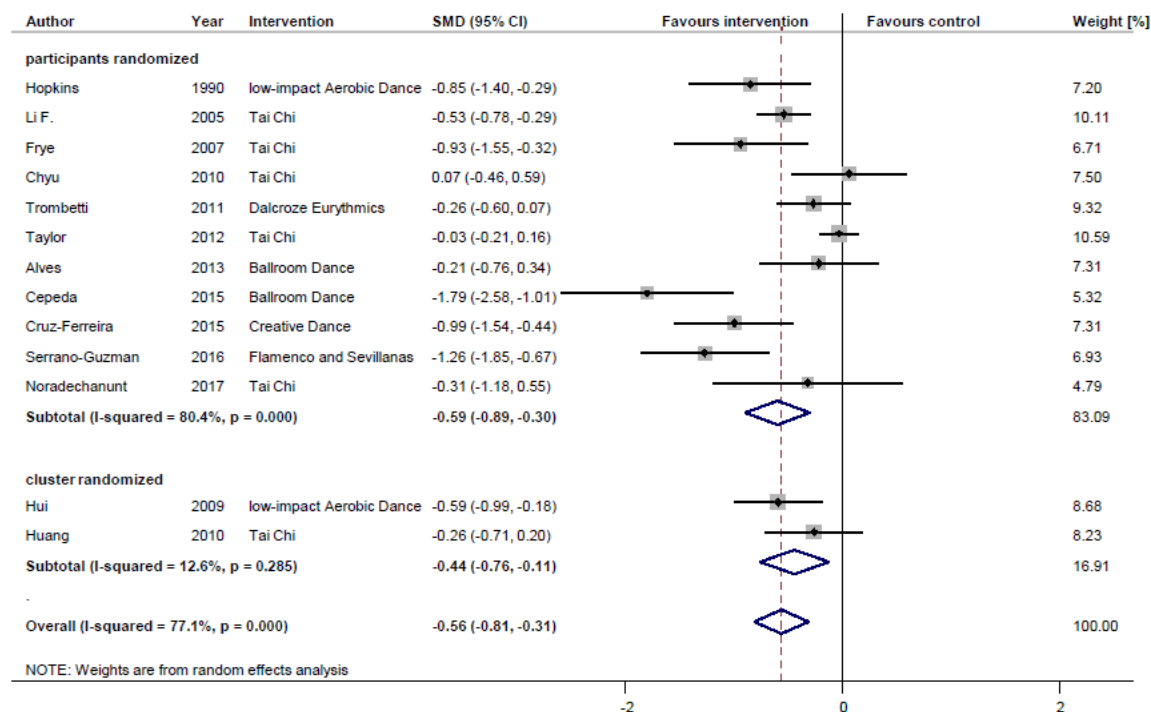

## Association of dance-based mind-motor activities with mobility by duration of one class

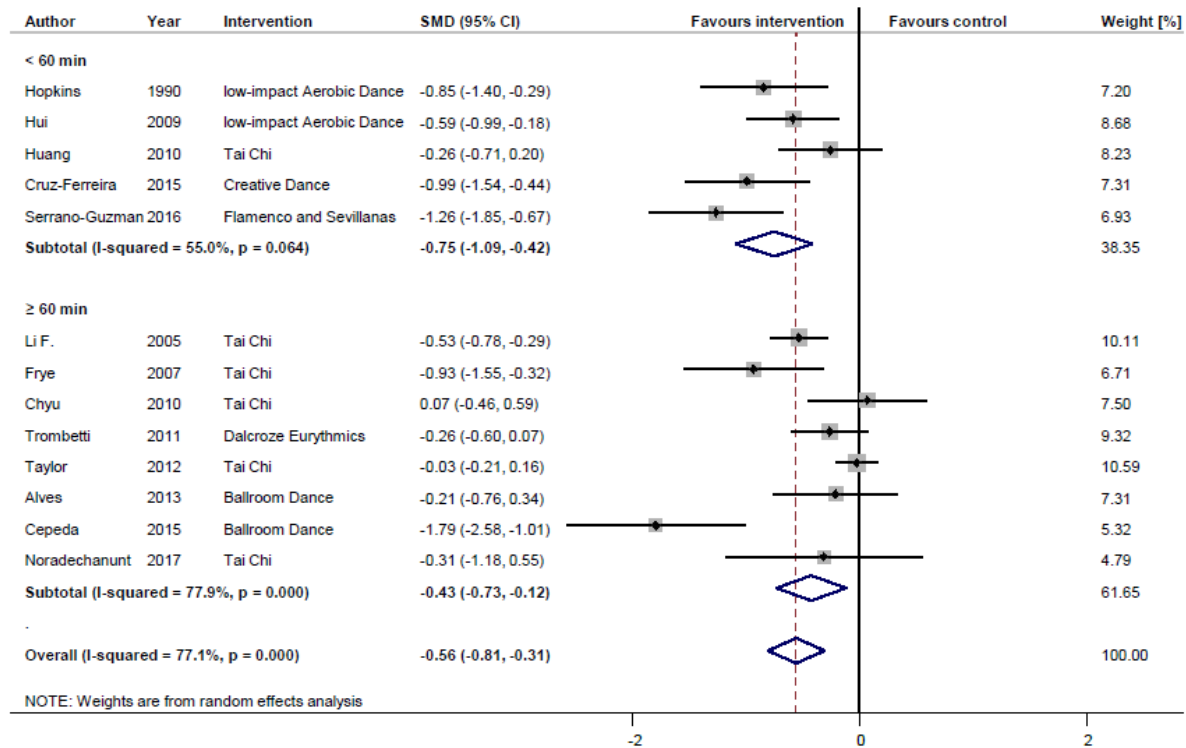

## Association of dance-based mind-motor activities with mobility by total contact time

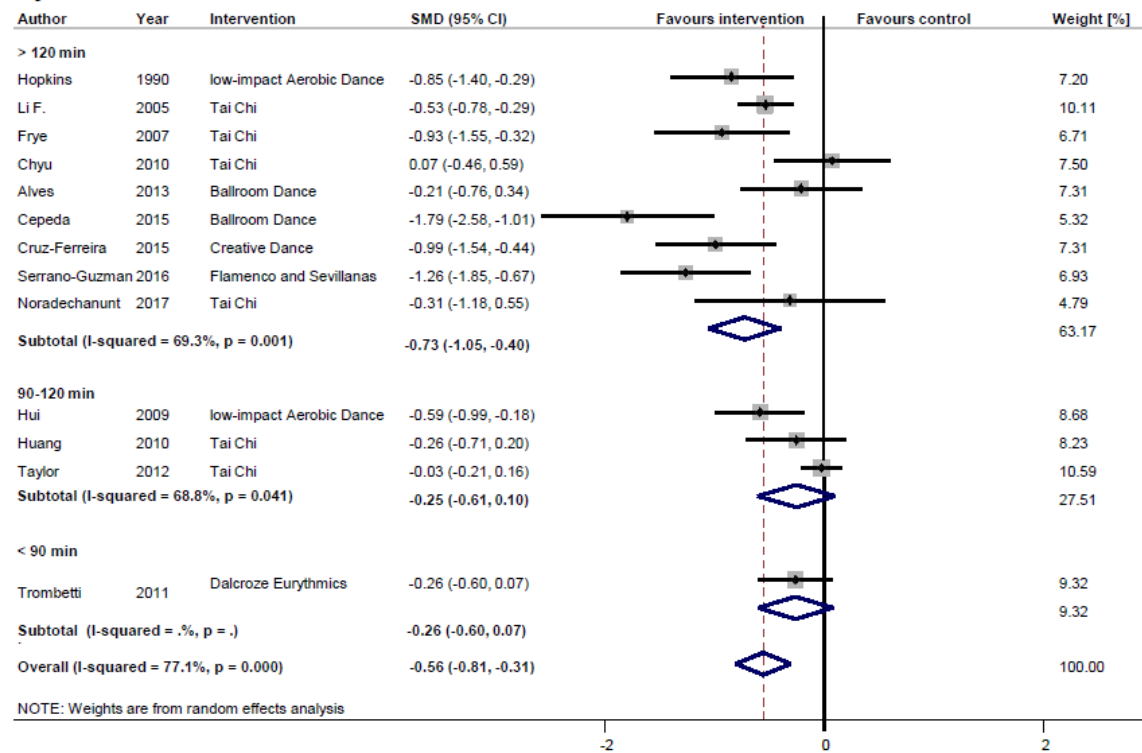

| <b>Strength (lower body) (N=13)</b> | <b>SMD (95%CI)</b>       | <b>I<sup>2</sup></b> |
|-------------------------------------|--------------------------|----------------------|
| <b>Full</b>                         | <b>0.57 (0.23, 0.91)</b> | <b>88.5%</b>         |
| <b>by intervention type</b>         |                          |                      |
| Tai Chi                             | 0.13 (-0.09, 0.34)       | 25.3%                |
| Non-Tai Chi                         | 0.86 (0.25, 1.47)        | 92.8%                |
| <b>by intervention frequency</b>    |                          |                      |
| < 3 times / week                    | 0.19 (-0.09, 0.46)       | 75.6%                |
| ≥ 3 times / week                    | 1.04 (0.31, 1.77)        | 88.1%                |
| <b>by intervention duration</b>     |                          |                      |
| > 24 weeks                          | -0.17 (0.33, -0.01)      | 0.0%                 |
| 12 - 24 weeks                       | 0.61 (0.13, 1.09)        | 88.8%                |
| < 12 weeks                          | 1.15 (0.73, 1.57)        | 0.0%                 |
| <b>by type of dwelling</b>          |                          |                      |
| community dwelling                  | 0.66 (0.27, 1.05)        | 86.9%                |
| institutionalized                   | -0.18 (-0.35, -0.01)     | --                   |
| <b>by type of randomization</b>     |                          |                      |
| participants randomized             | 0.66 (0.23, 1.08)        | 87.4%                |
| cluster randomized                  | 0.25 (0.63, 1.13)        | 93.6%                |
| <b>by duration of one class</b>     |                          |                      |
| < 60 min                            | 1.13 (0.46, 1.81)        | 87.7%                |
| ≥ 60 min                            | 0.16 (-0.10, 0.41)       | 68.7%                |
| <b>by total contact time</b>        |                          |                      |
| 90 - 120 min                        | 0.27 (-0.06, 0.61)       | 85.7%                |
| > 120 min                           | 0.86 (0.21, 1.51)        | 85.3%                |

## Association of dance-based mind-motor activities with LBS by intervention type

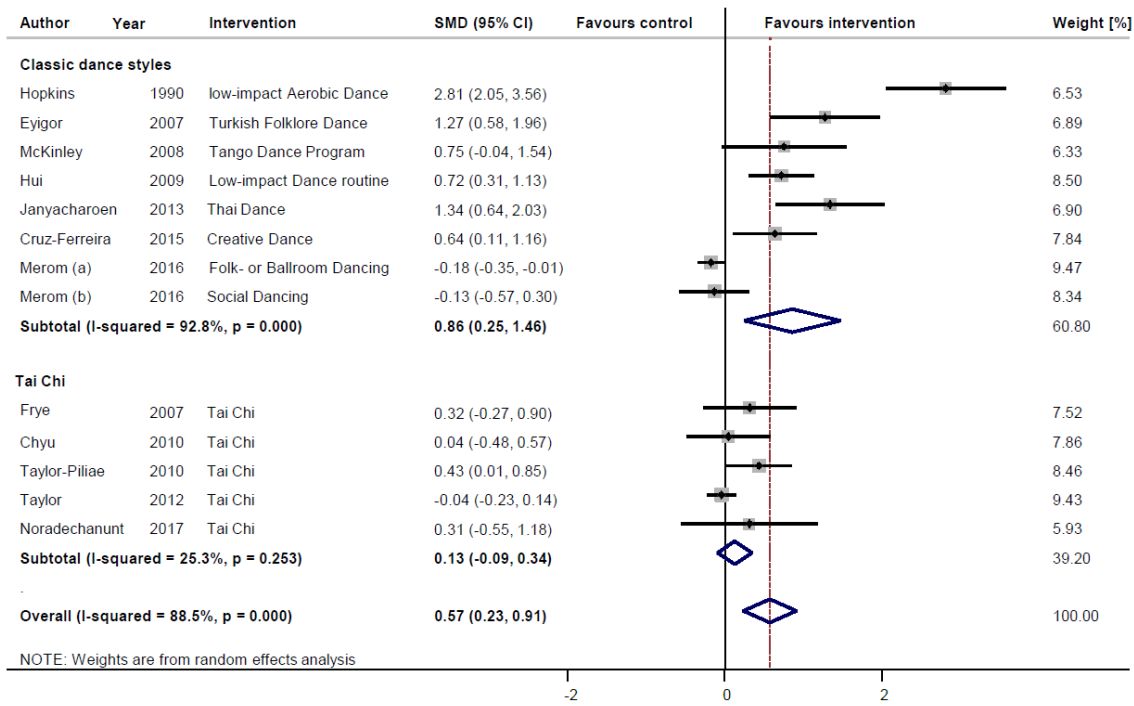

## Association of dance-based mind-motor activities with LBS by intervention frequency

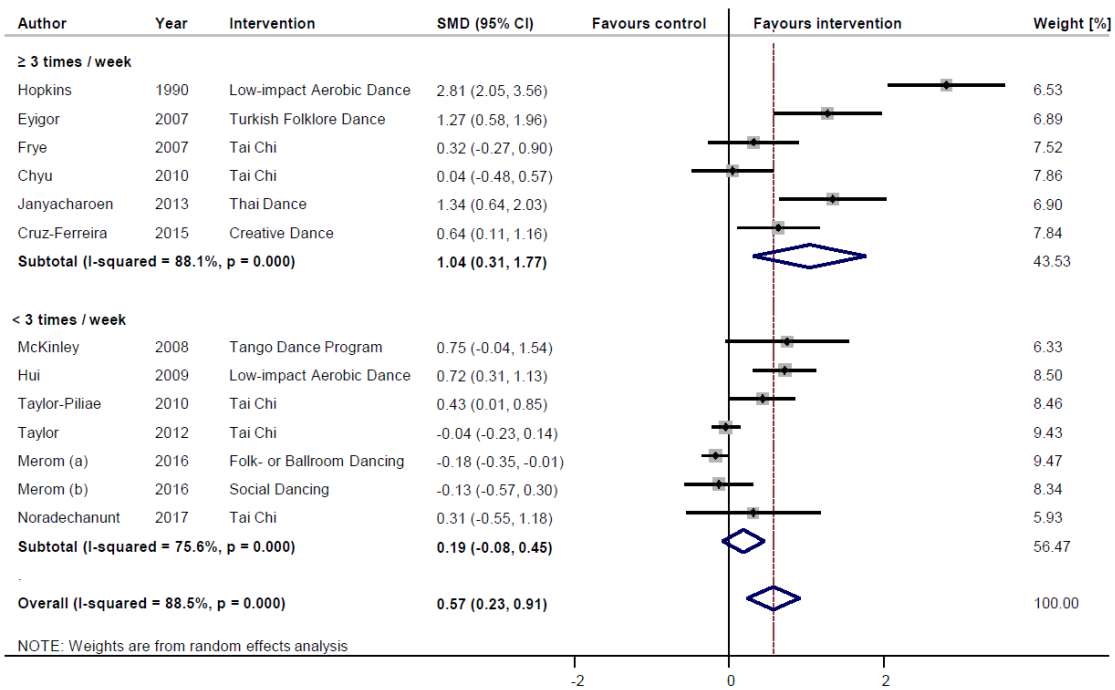



## Association of dance-based mind-motor activities with LBS by intervention duration

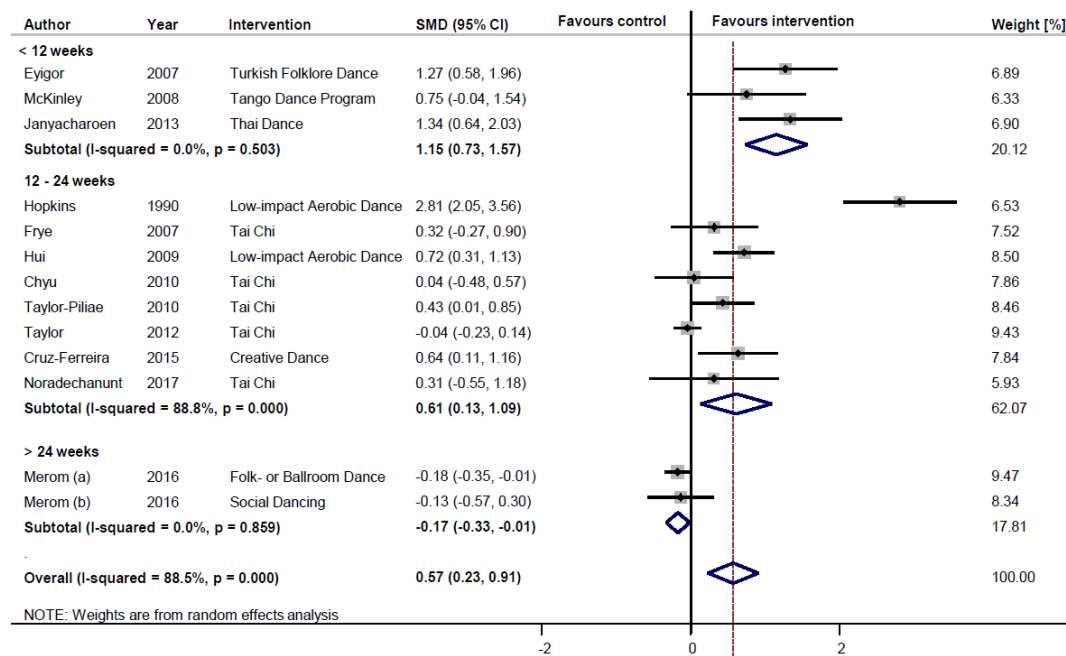

## Association of dance-based mind-motor activities with LBS by type of dwelling

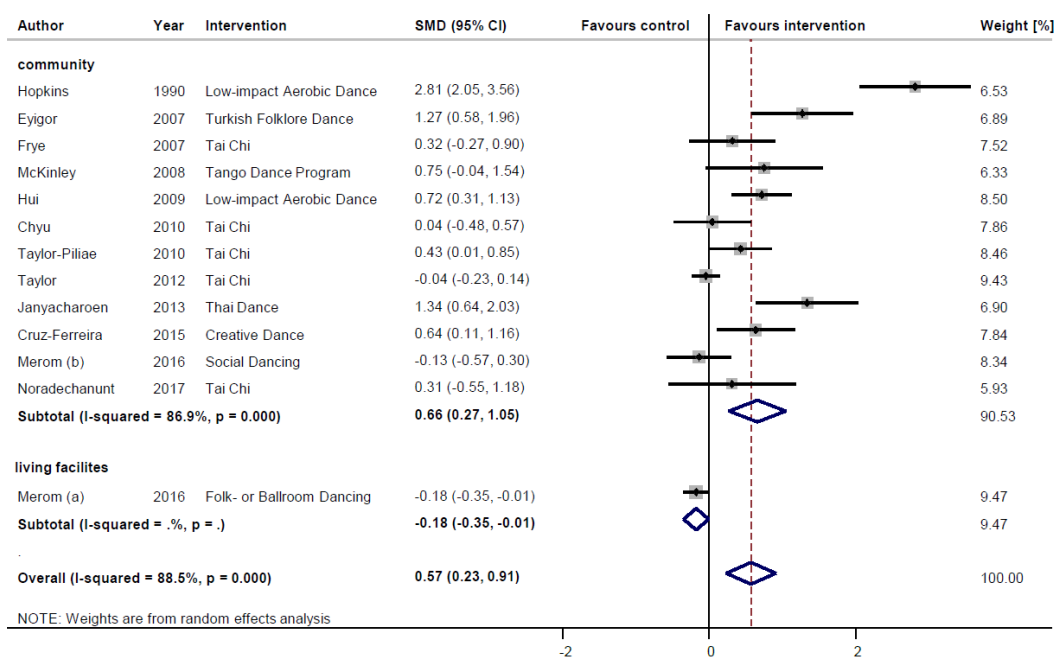

## Association of dance-based mind-motor activities with LBS by type of randomization

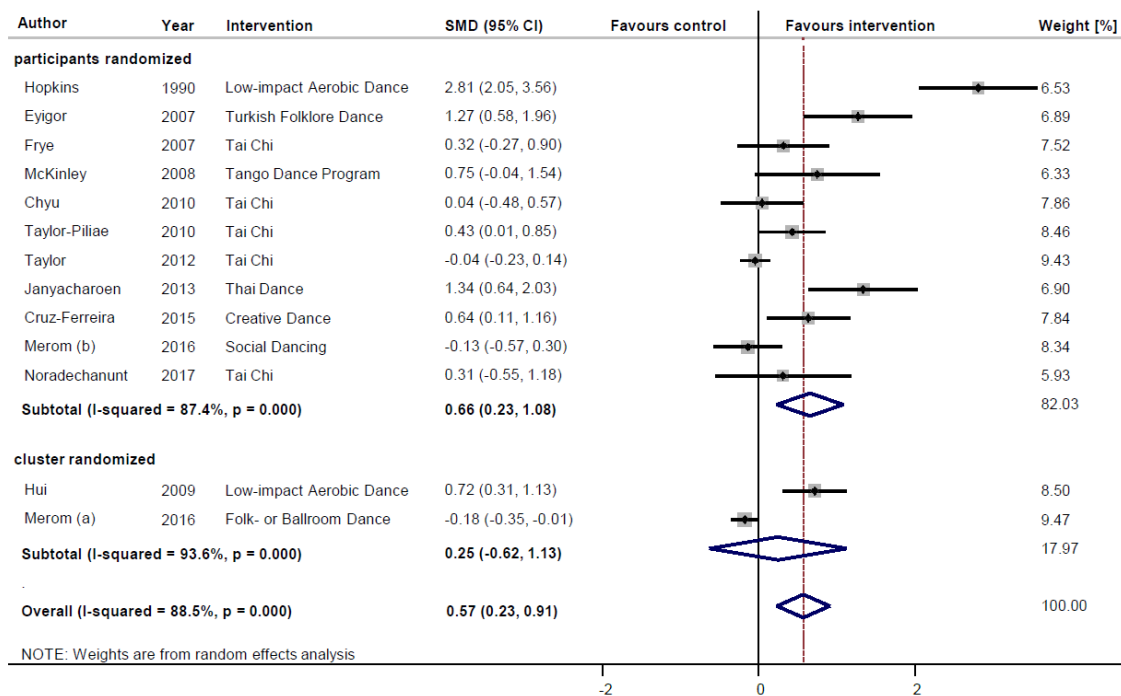

## Association of dance-based mind-motor activities with LBS by duration of one class

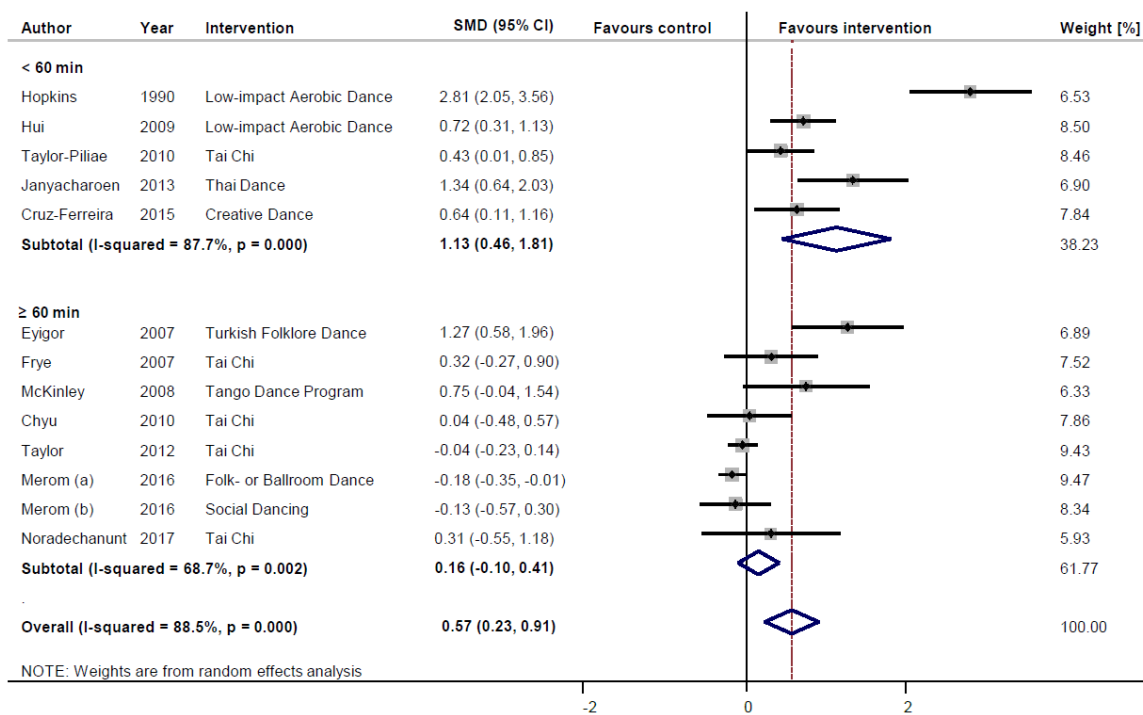

## Association of dance-based mind-motor activities with LBS by total contact time

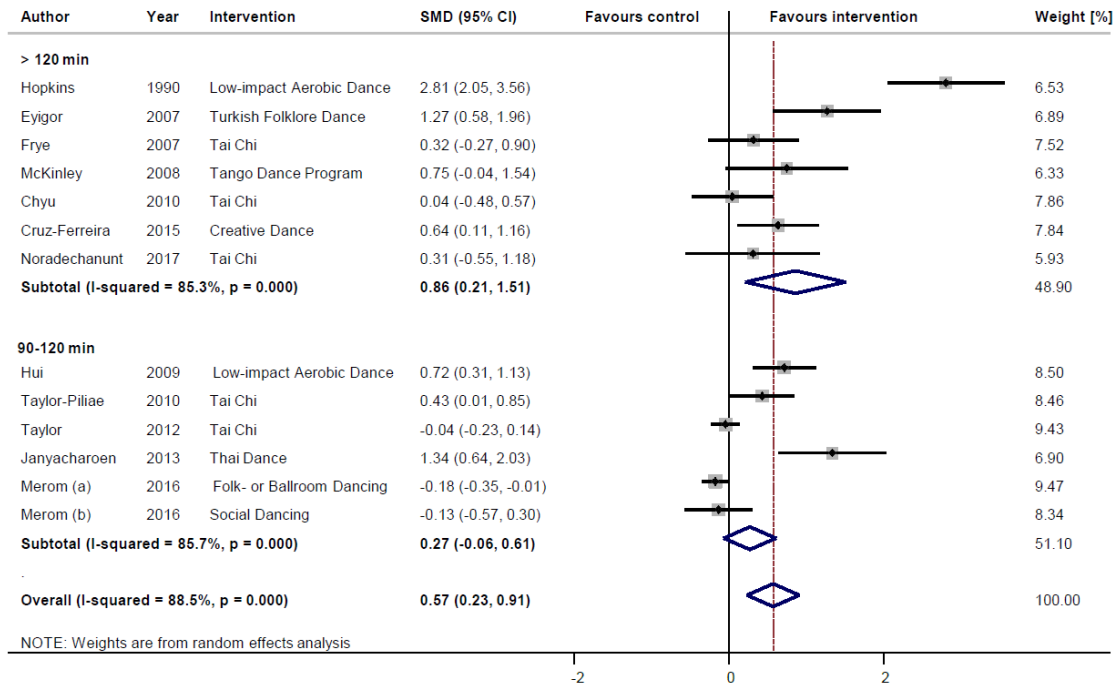

## Sensitivity Analyses Secondary Outcomes

### Association of dance-based mind-motor activities with balance Sensitivity analysis 1: without Hopkins et al.

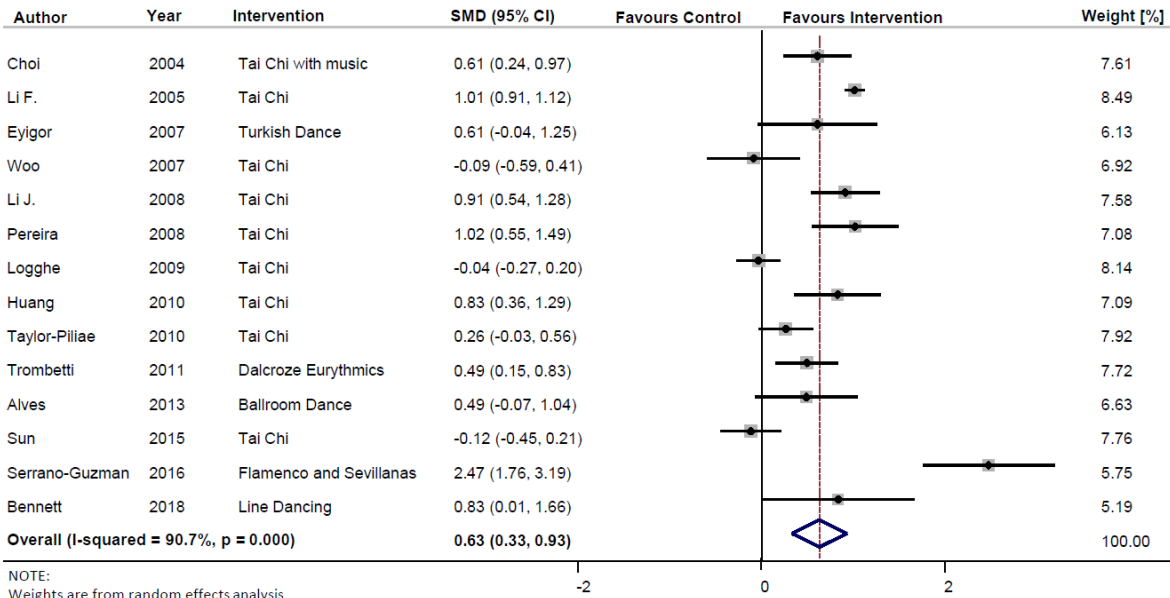

NOTE:  
Weights are from random effects analysis  
Total sample size by pooling 14 studies, n = 1423  
Included assessments are Berg Balance Scale (BBS), One Leg Stand (OLS), and Functional Reach (FR)  
Effect sizes are Hedges' *g* standardized mean differences (SMD)

### Association of dance-based mind-motor activities with balance Sensitivity analysis 2: without Serrano-Guzmann et al.

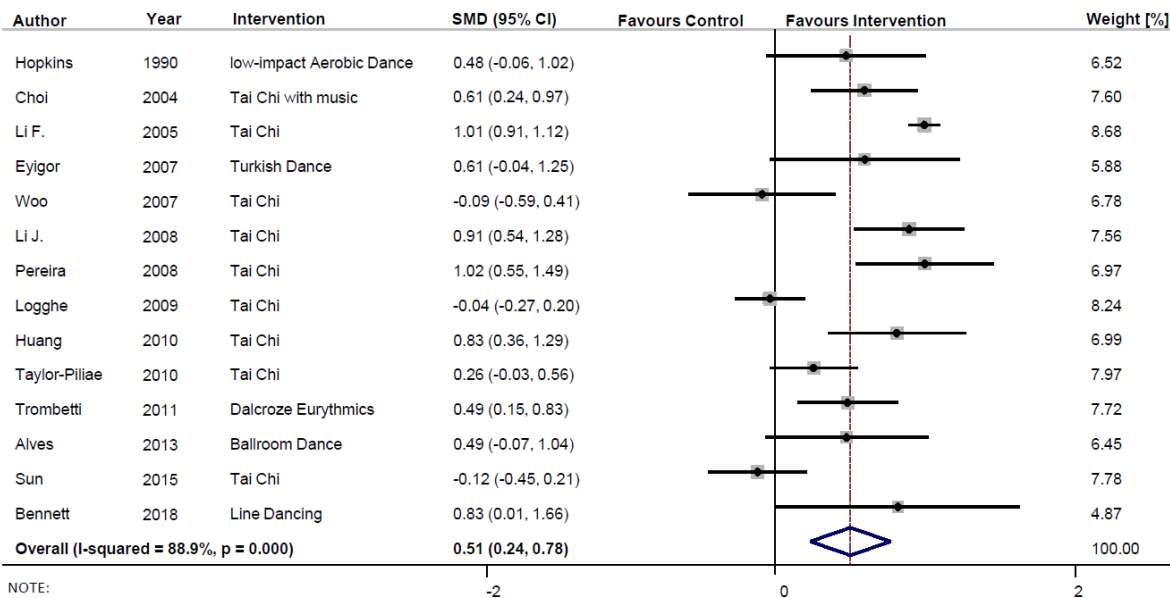

NOTE:  
Weights are from random effects analysis  
Total sample size by pooling 14 studies, n = 1424  
Included assessments are Berg Balance Scale (BBS), One Leg Stand (OLS), and Functional Reach (FR)  
Effect sizes are Hedges' *g* standardized mean differences (SMD)

## Association of dance-based mind-motor activities with mobility Sensitivity analysis 1: without Hopkins et al.

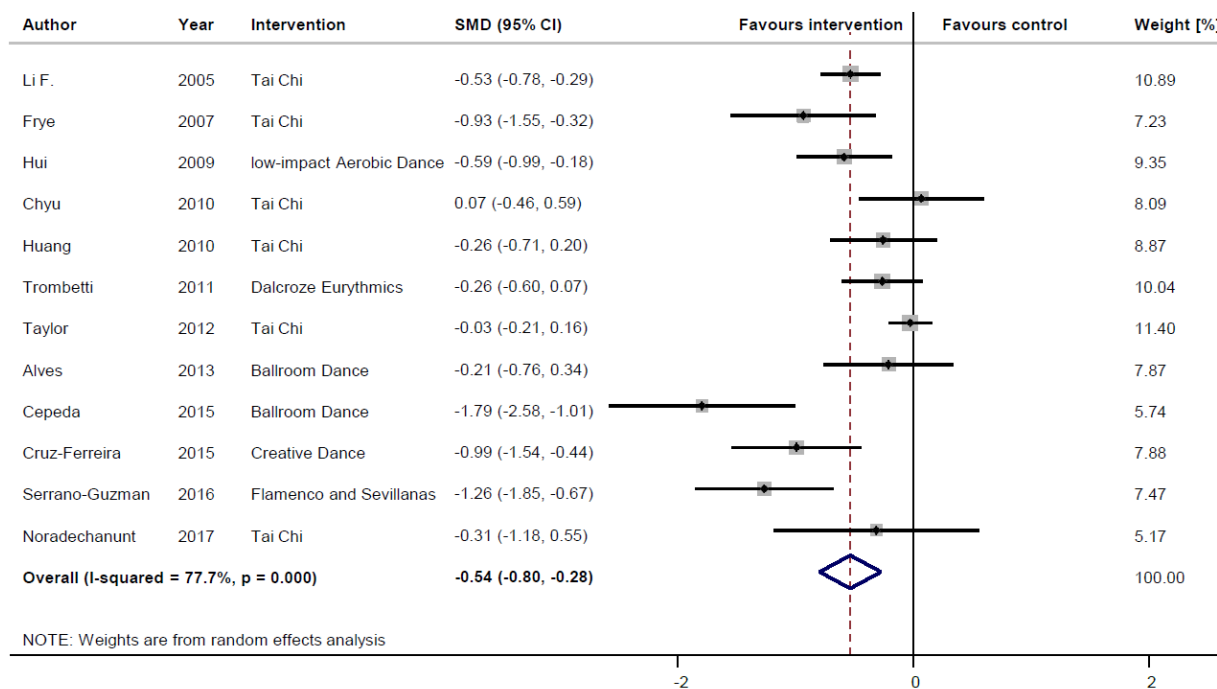

## Association of dance-based mind-motor activities with mobility Sensitivity analysis 2: without Cepeda et al.

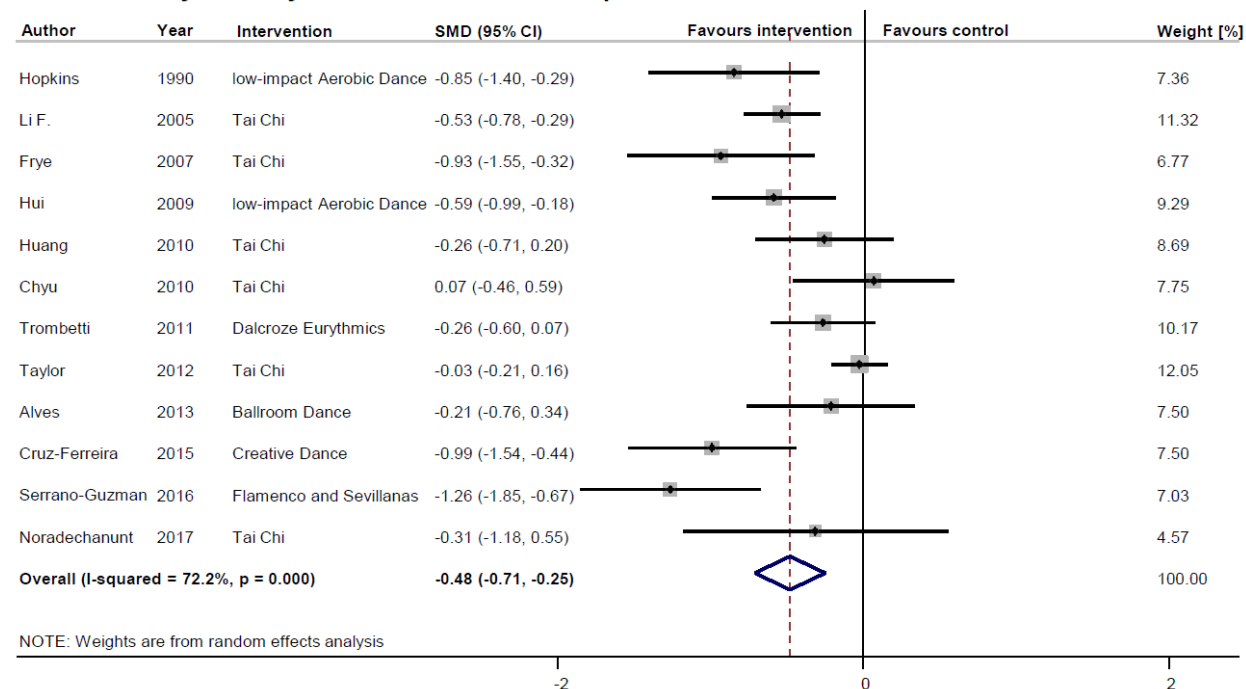

# Association of dance-based mind-motor activities with LBS

## Sensitivity analysis 1: without Hopkins et al.

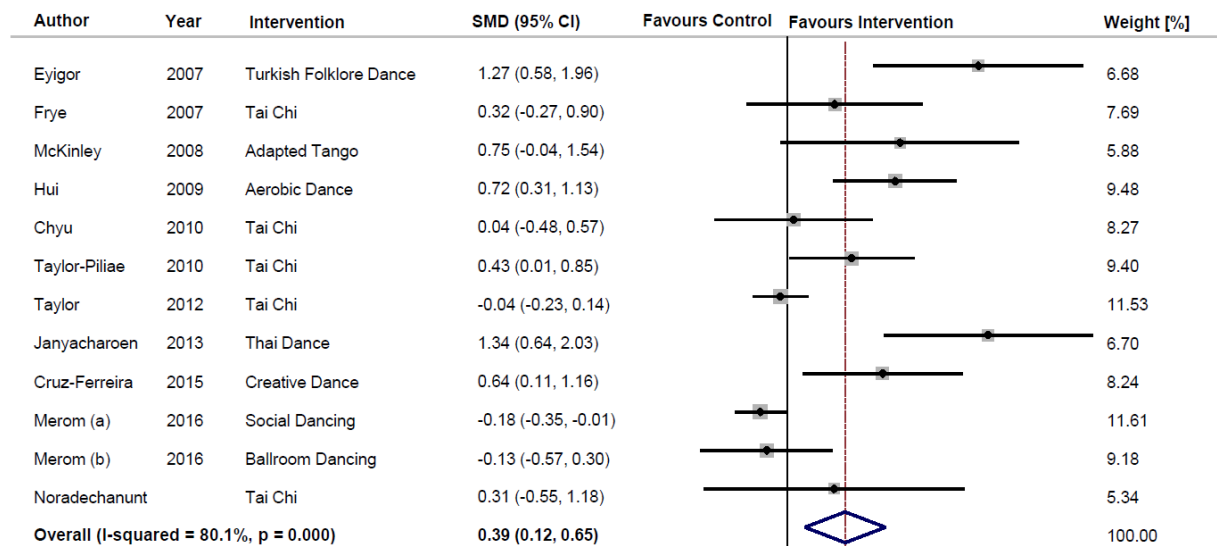

**NOTE:**

Weights are from random effects analysis

LBS = Lower Body Strength; Total sample size by pooling 12 studies, n = 1560

Included assessments are Sit to Stand Tests (STS): 5x STS assesses time needed to complete 5 stands, 30sec STS assesses how many stands can be completed within 30 sec

Effect sizes are Hedges' *g* standardized mean differences (SMD)

Effect sizes of 5x STS were multiplied by (-1) to achieve same direction signaling improvement as effect sizes of 30sec STS
